# Supplementary material for: Synthesis of the Isodityrosine Moiety of Seongsanamide A–D and Its Derivatives
Source: MDPI journal article supplement (doi:10.3390/md21070373), 2023-06-25

## **Synthesis of isodityrosine moiety of seongsanamide A-D and its derivatives**

**Yang Xie<sup>1</sup>, Zhou Xu<sup>2</sup>, Pei Hu<sup>2</sup>, Xiao-Ting Tian<sup>2</sup>, Yi-Hong Lu<sup>2</sup>, Hao-Dong Jiang<sup>2</sup>, Cheng-Gang Huang<sup>2,\*</sup> and Zhi-Cai Shang<sup>1,\*</sup>**

<sup>1</sup>Department of Chemistry, Zhejiang University, Hangzhou 310027, China

<sup>2</sup>Shanghai Institute of Materia Medica, Chinese Academy of Sciences, Shanghai 201203, China

### **Table of contents**

#### **1. Copies of <sup>1</sup>H and <sup>13</sup>C NMR spectra of compounds described**



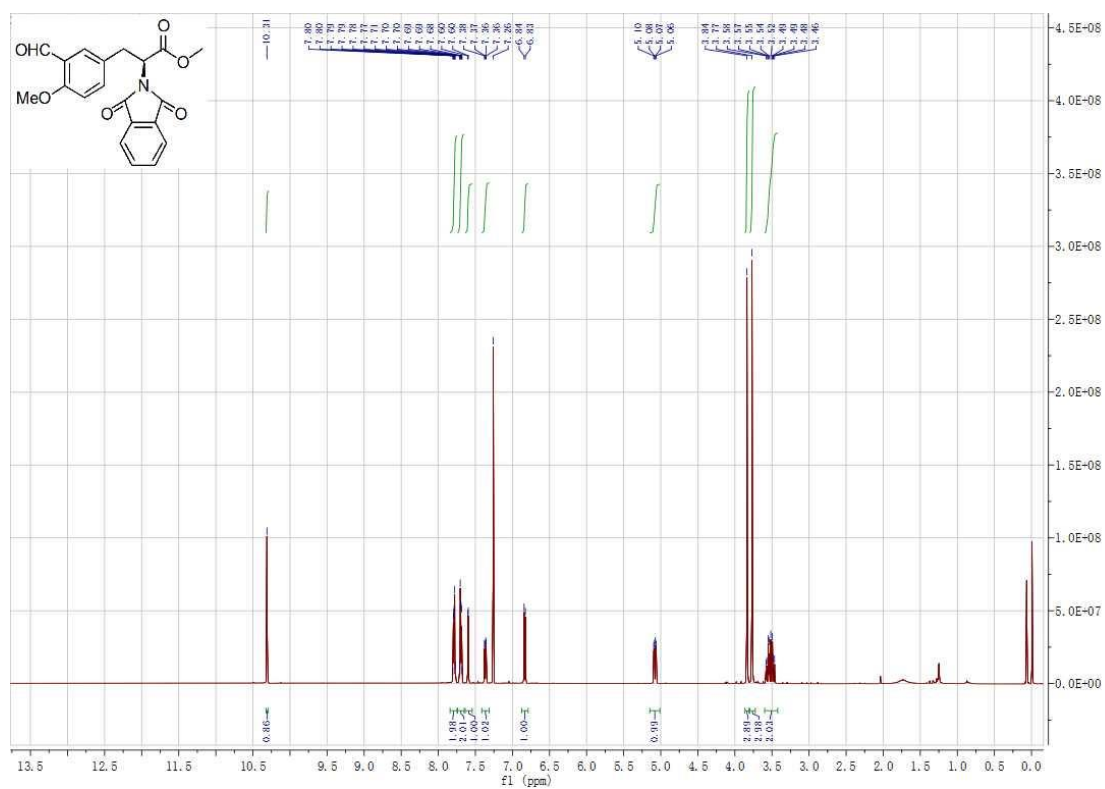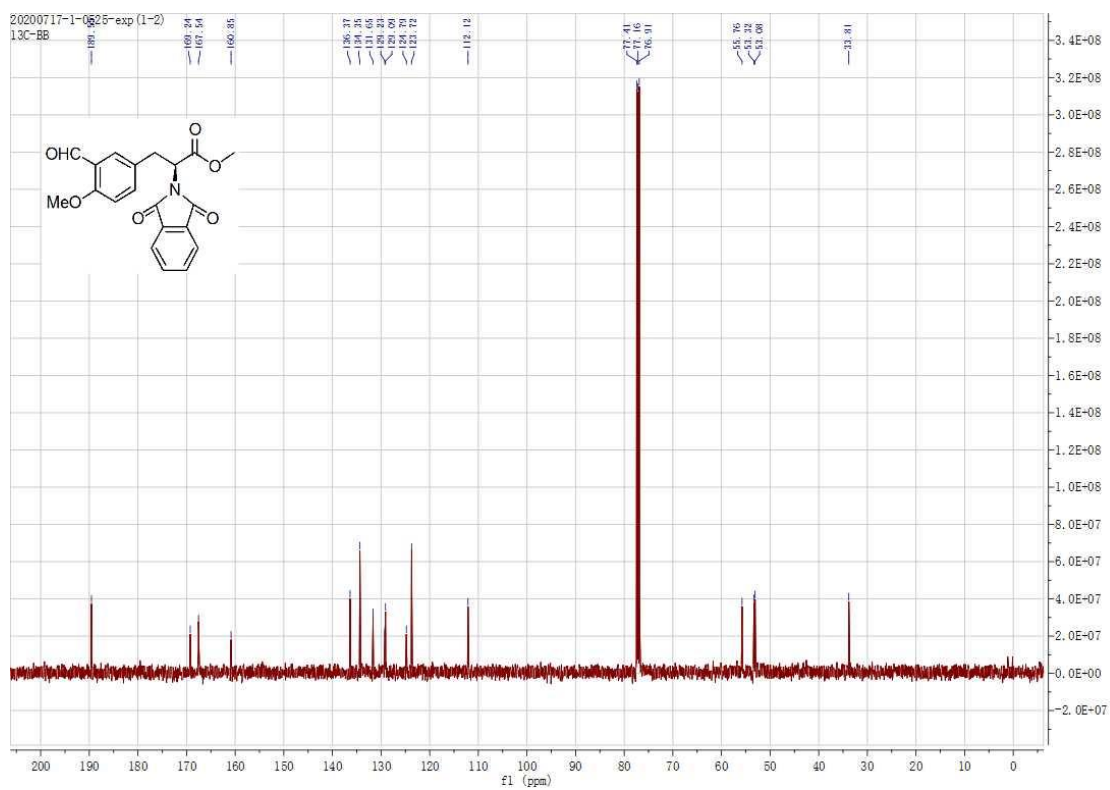

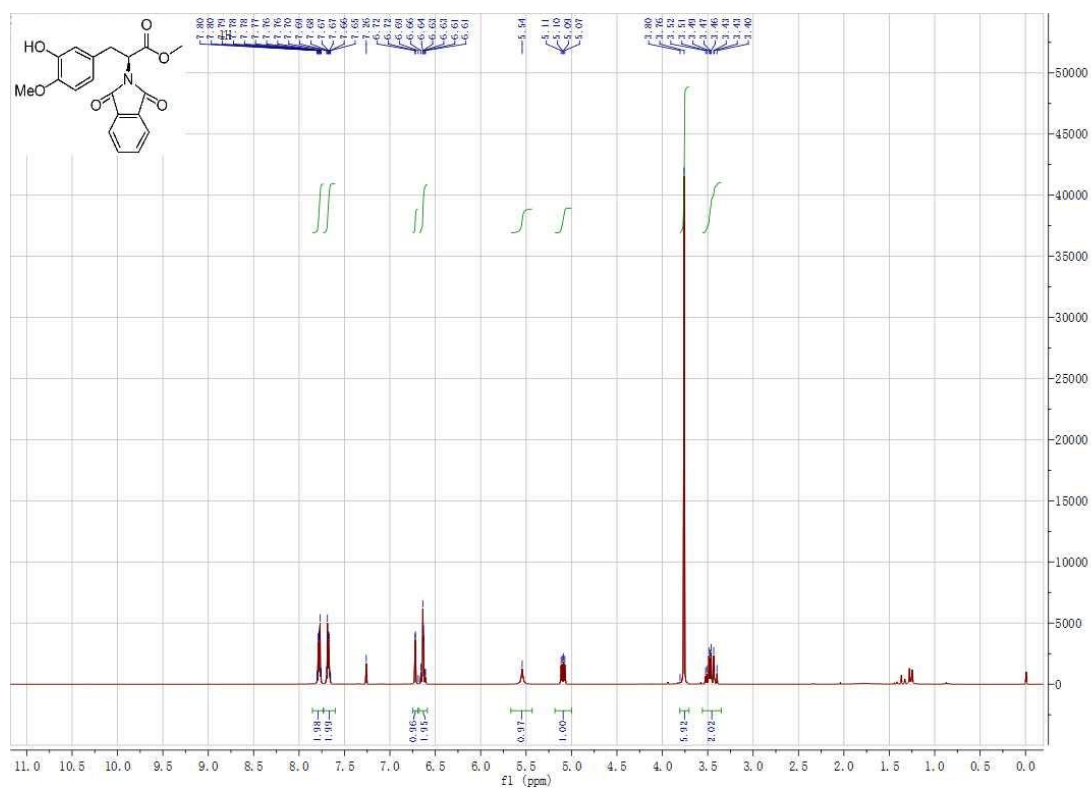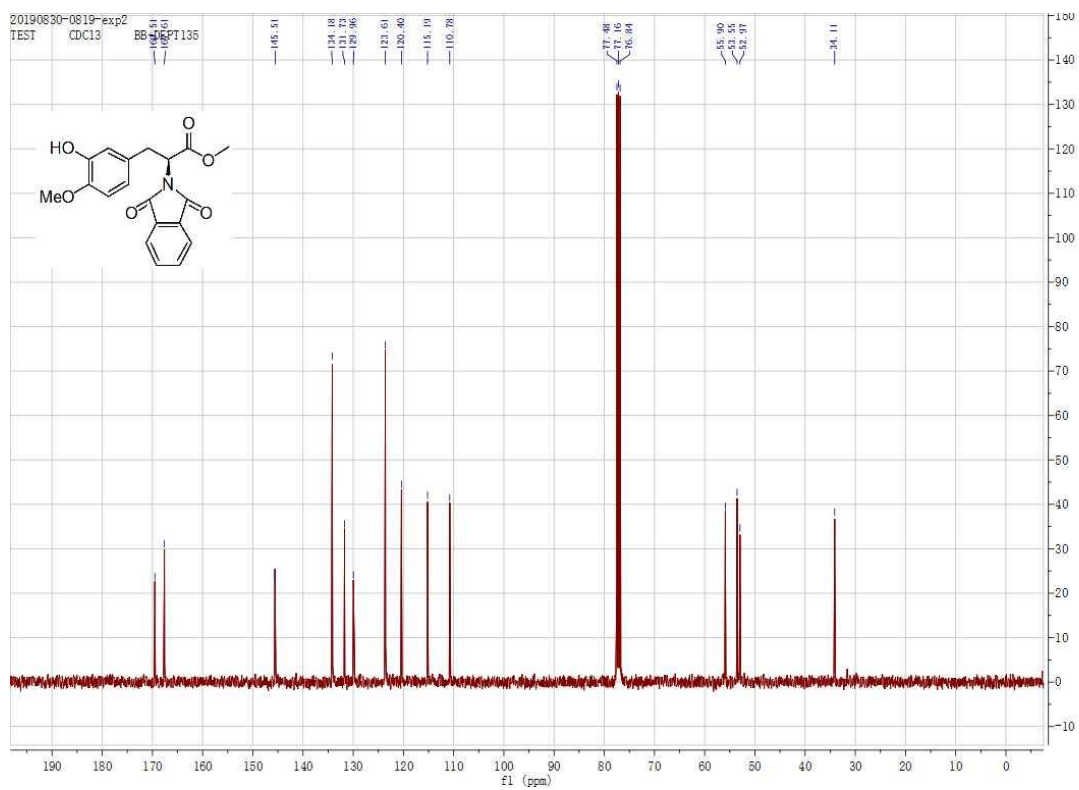

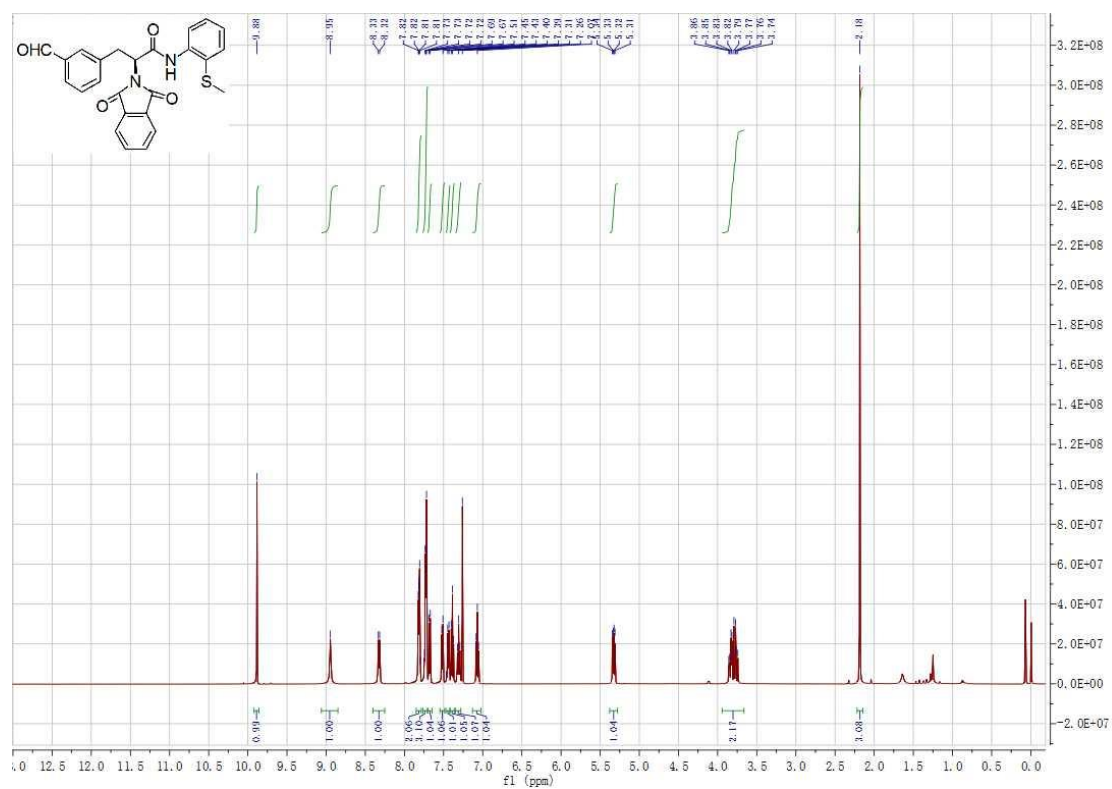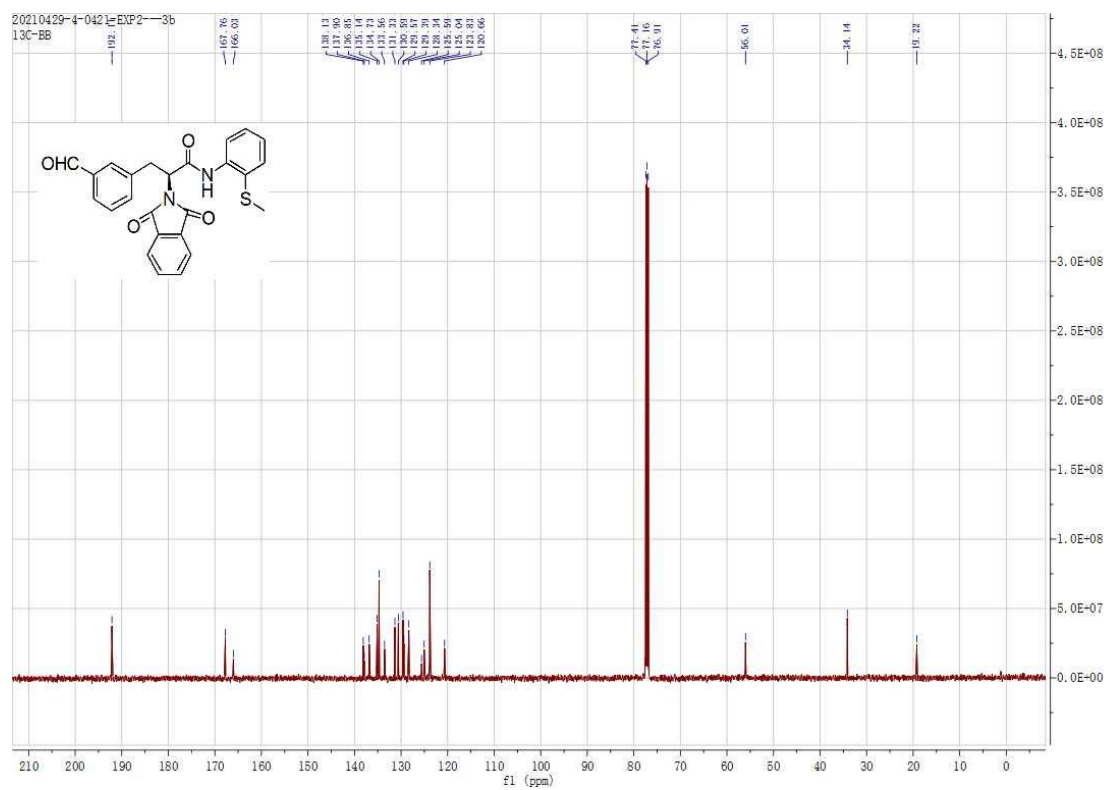

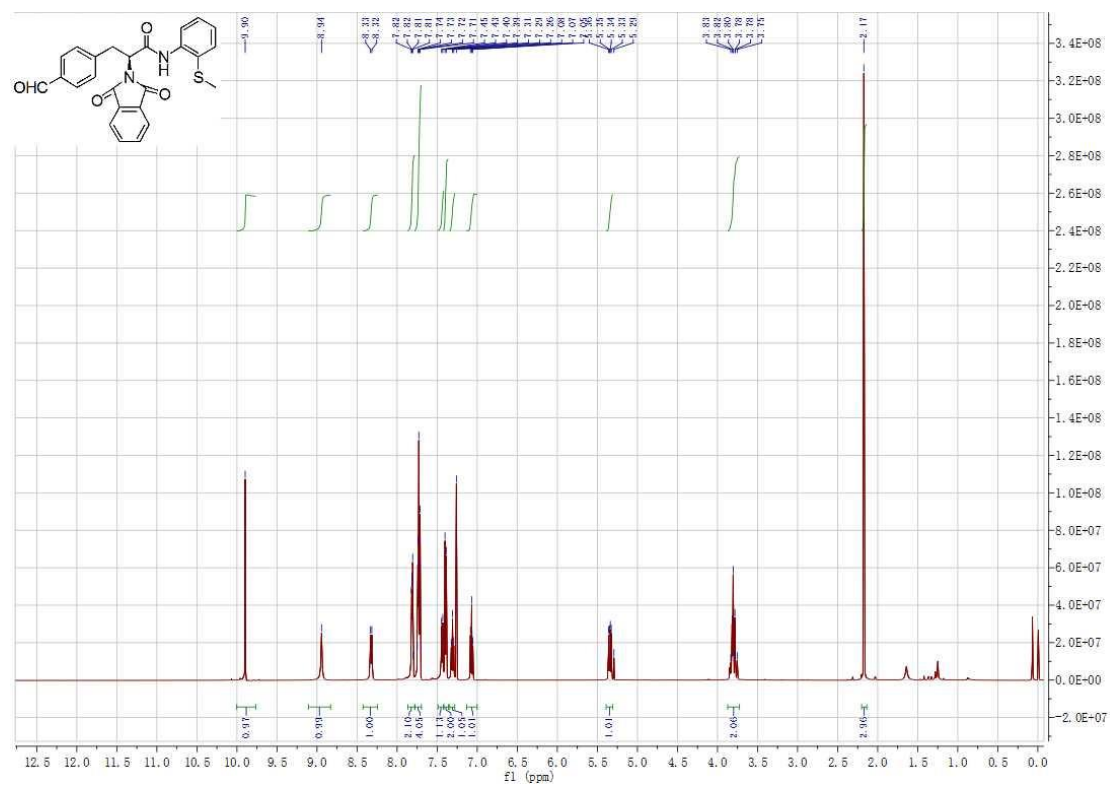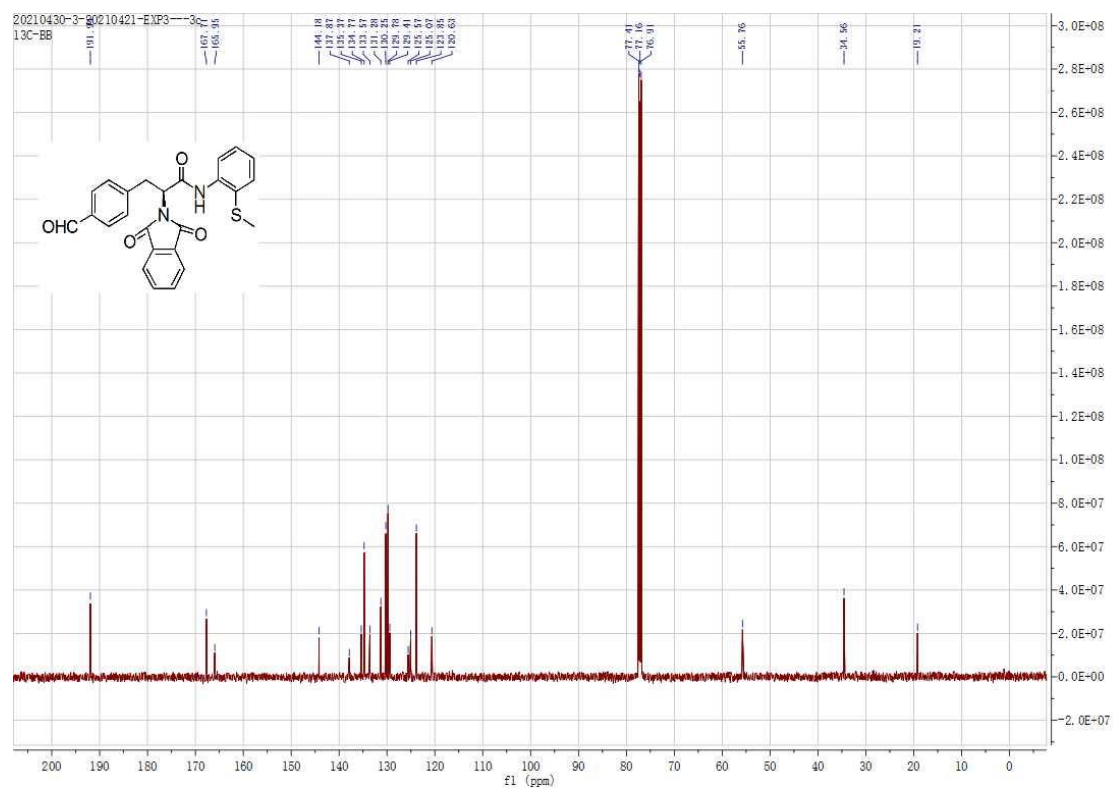

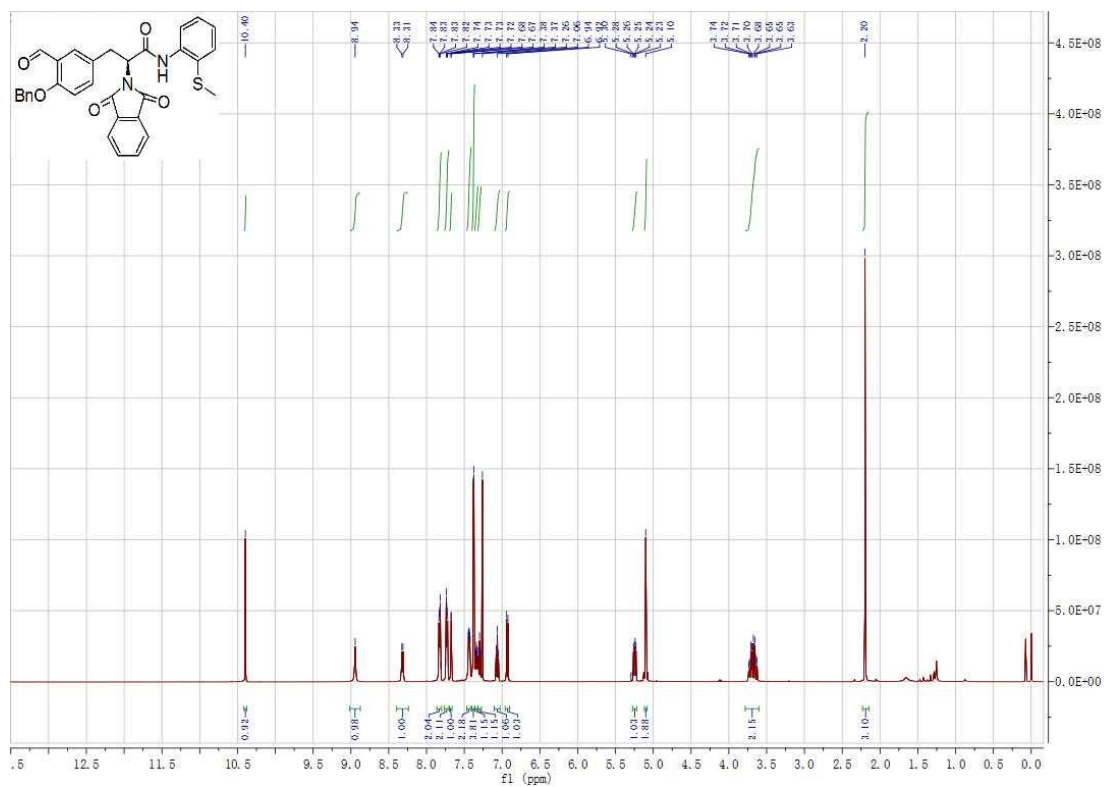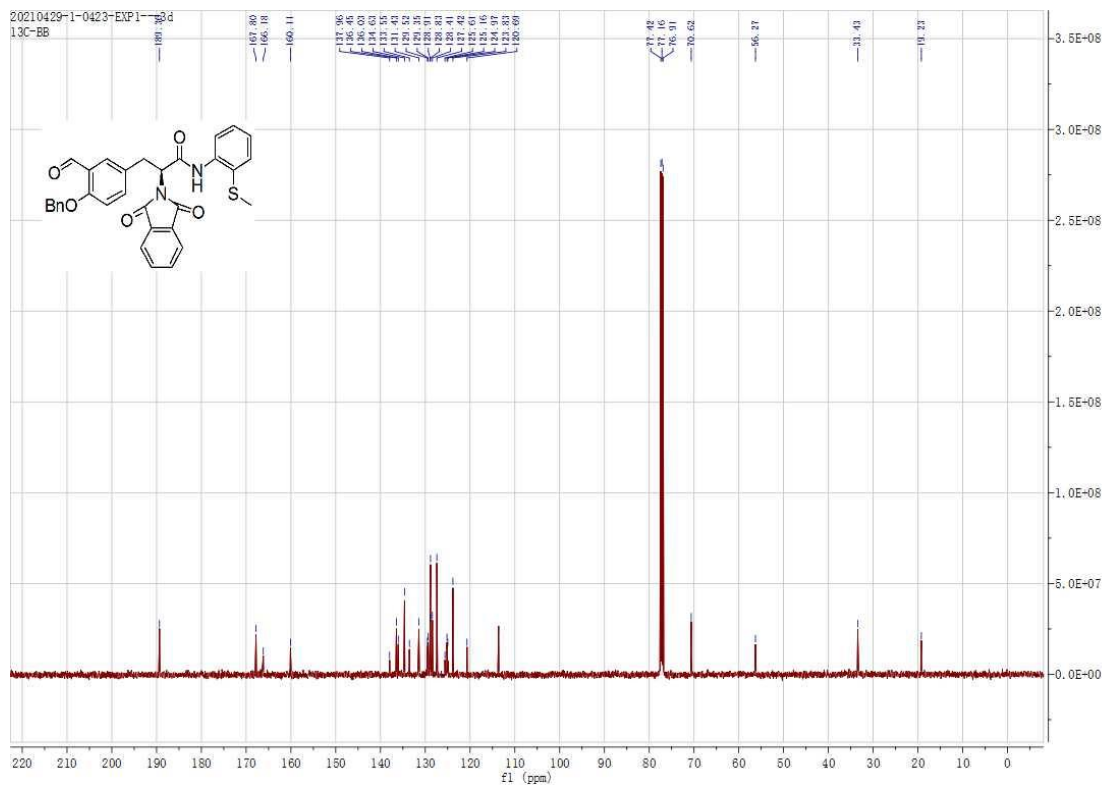

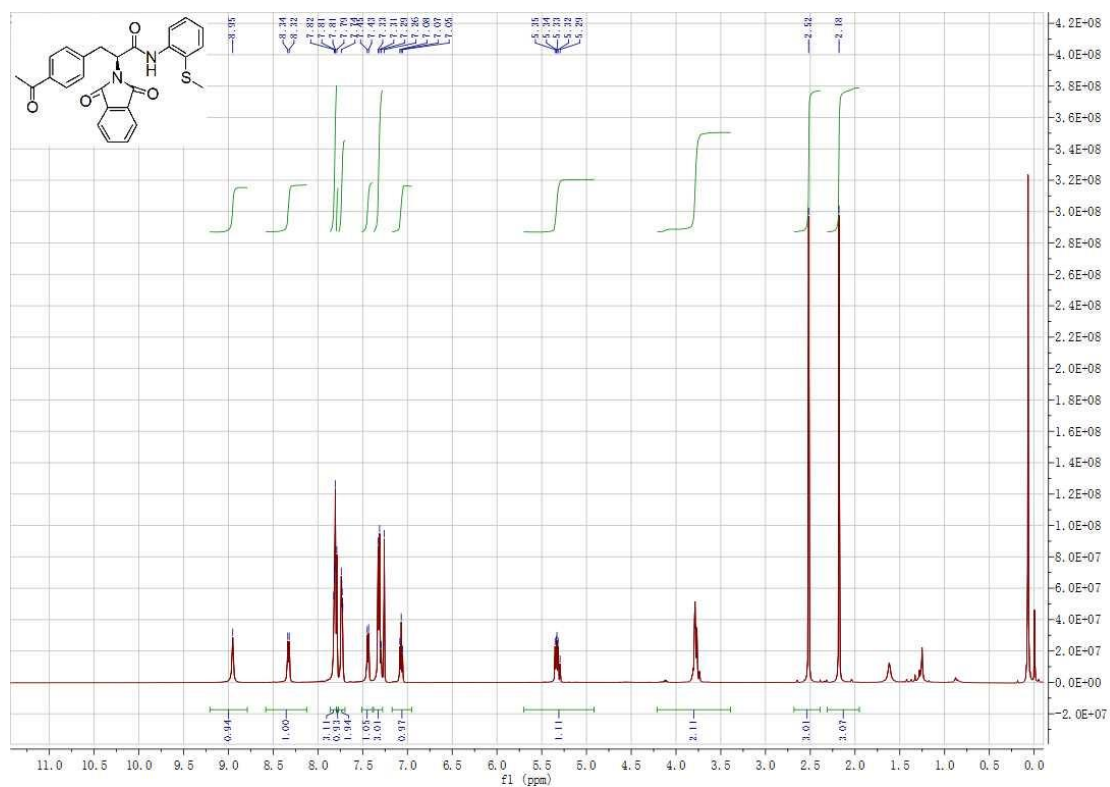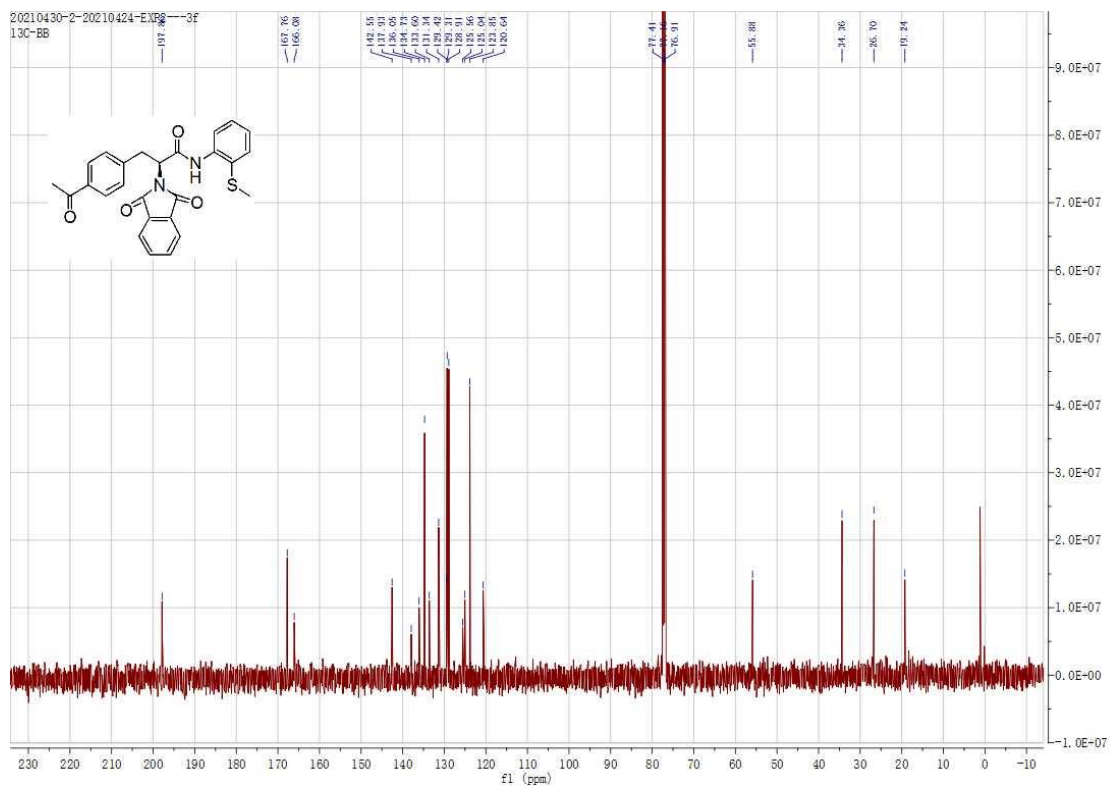



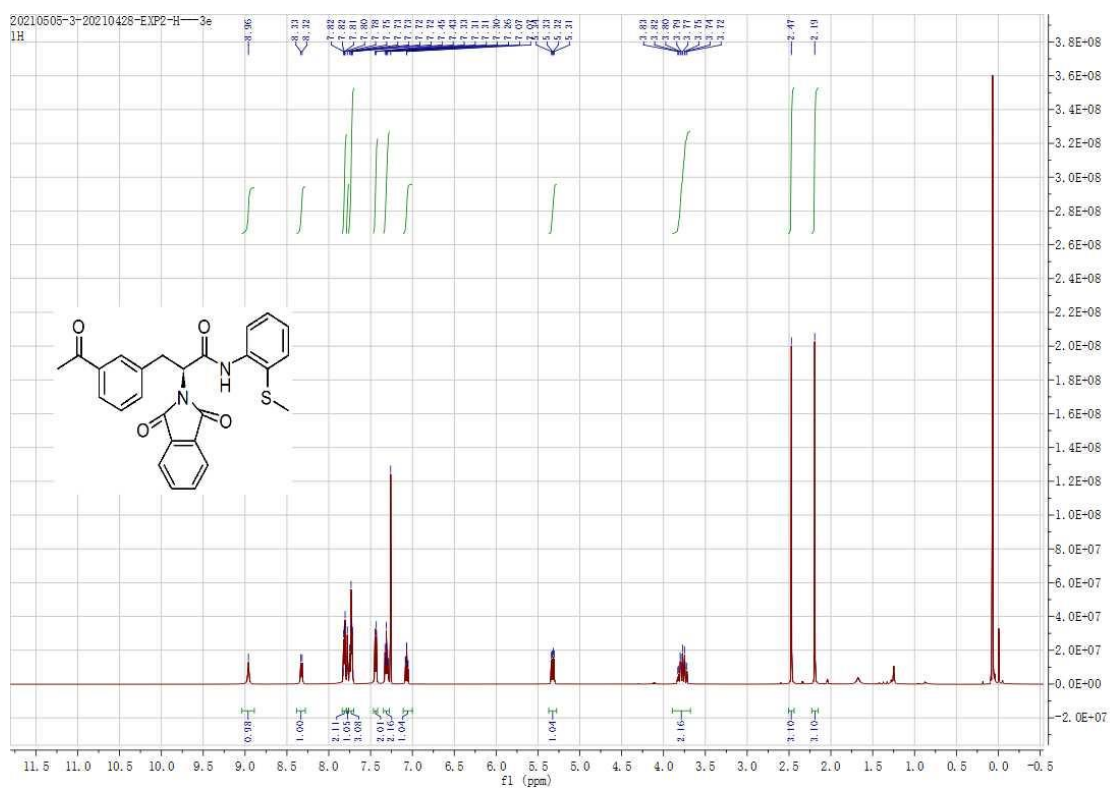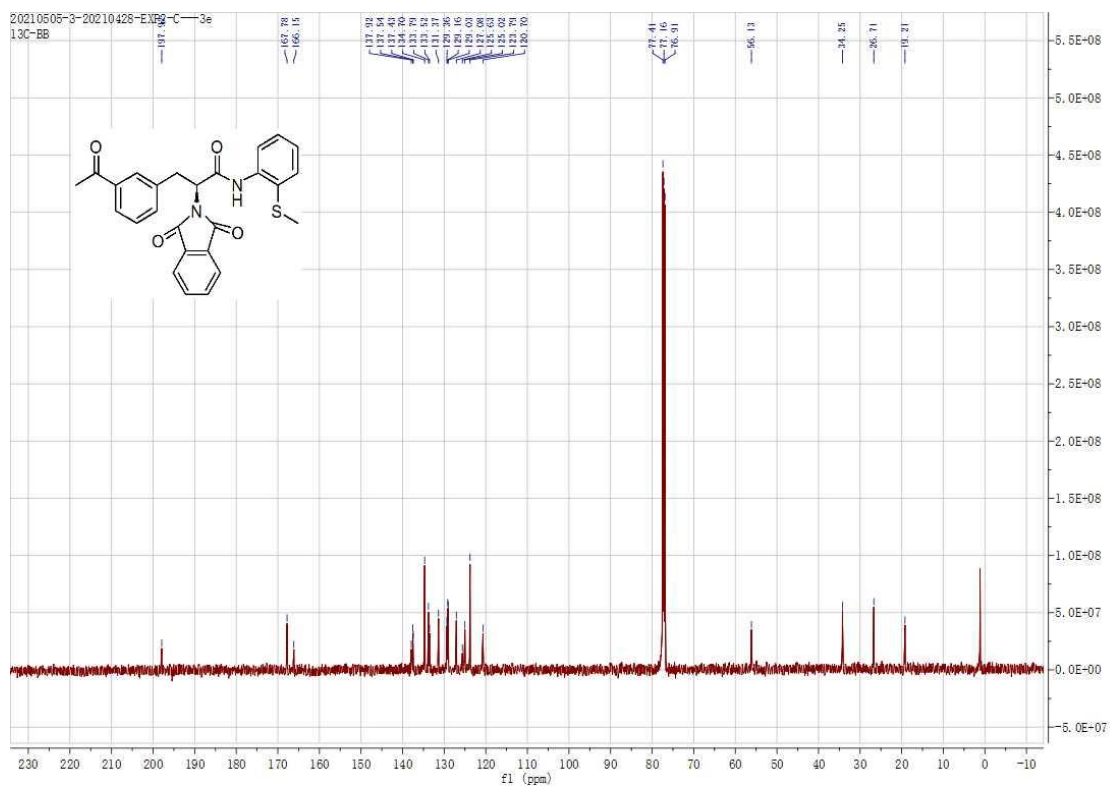

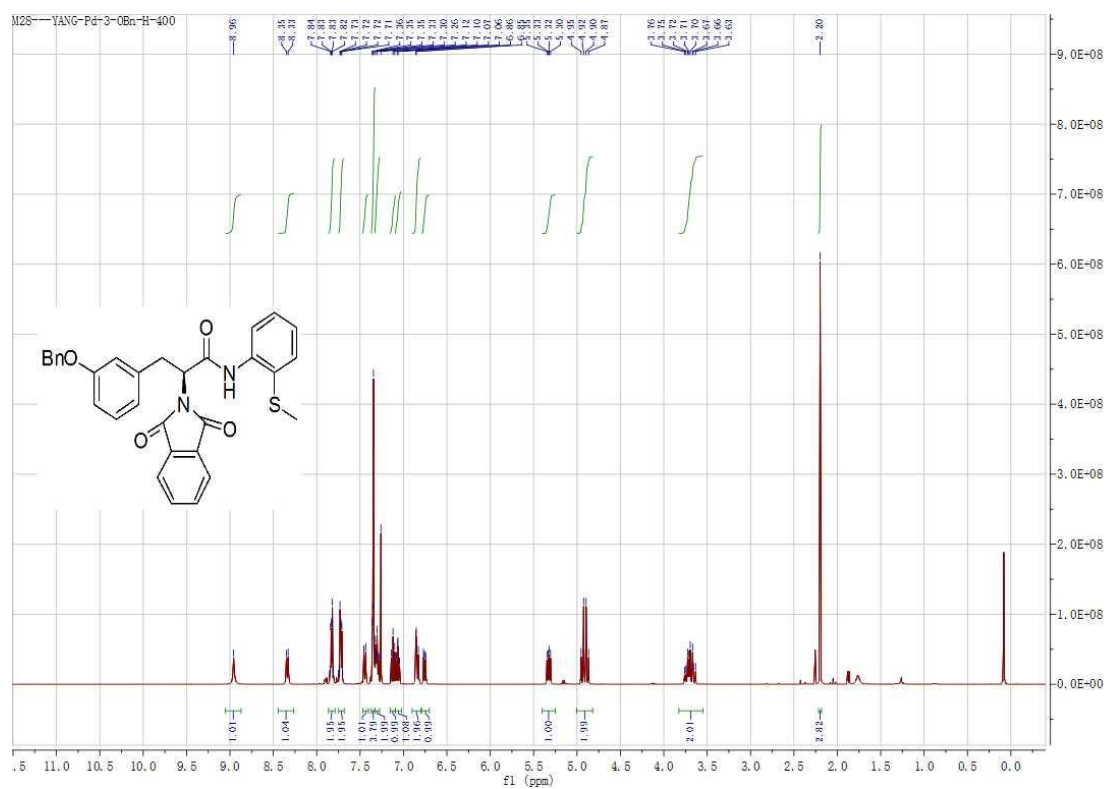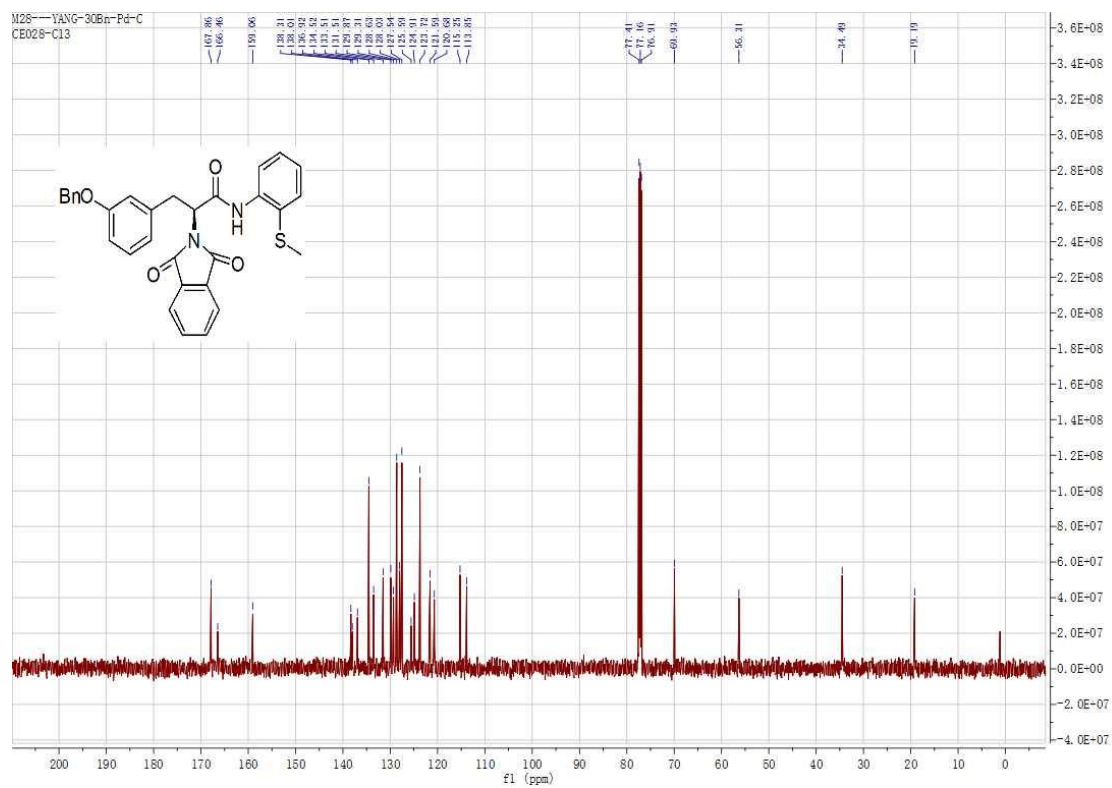

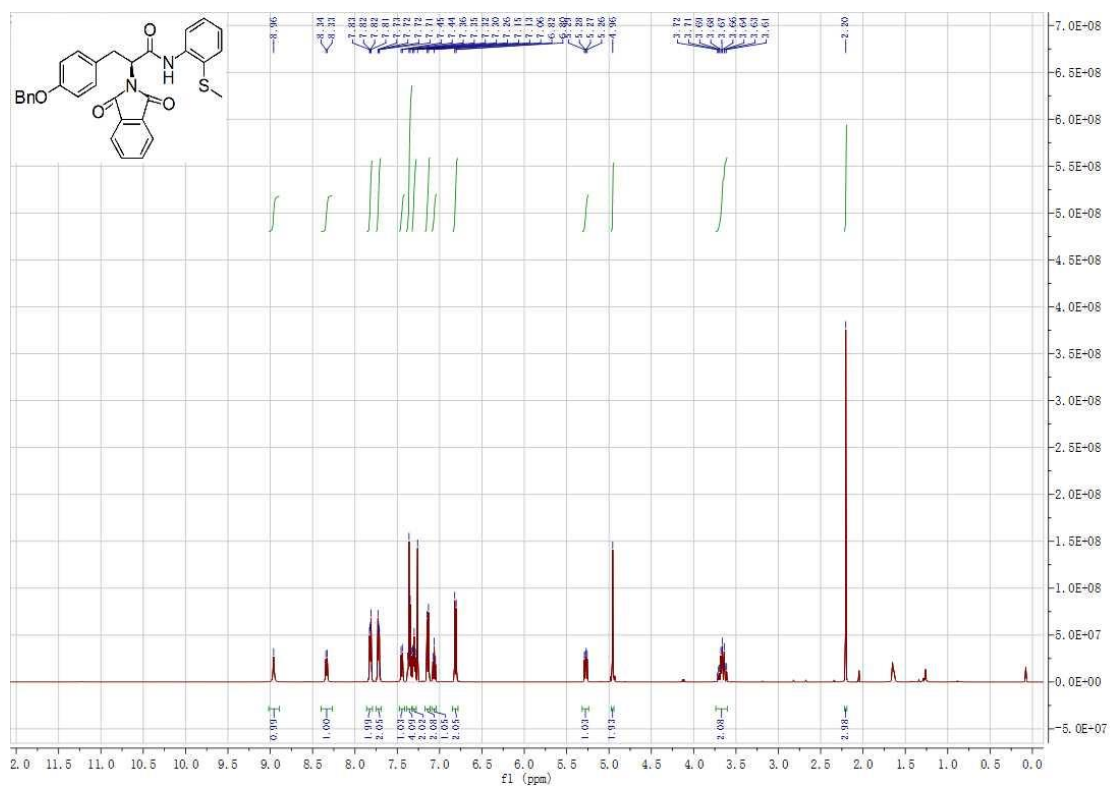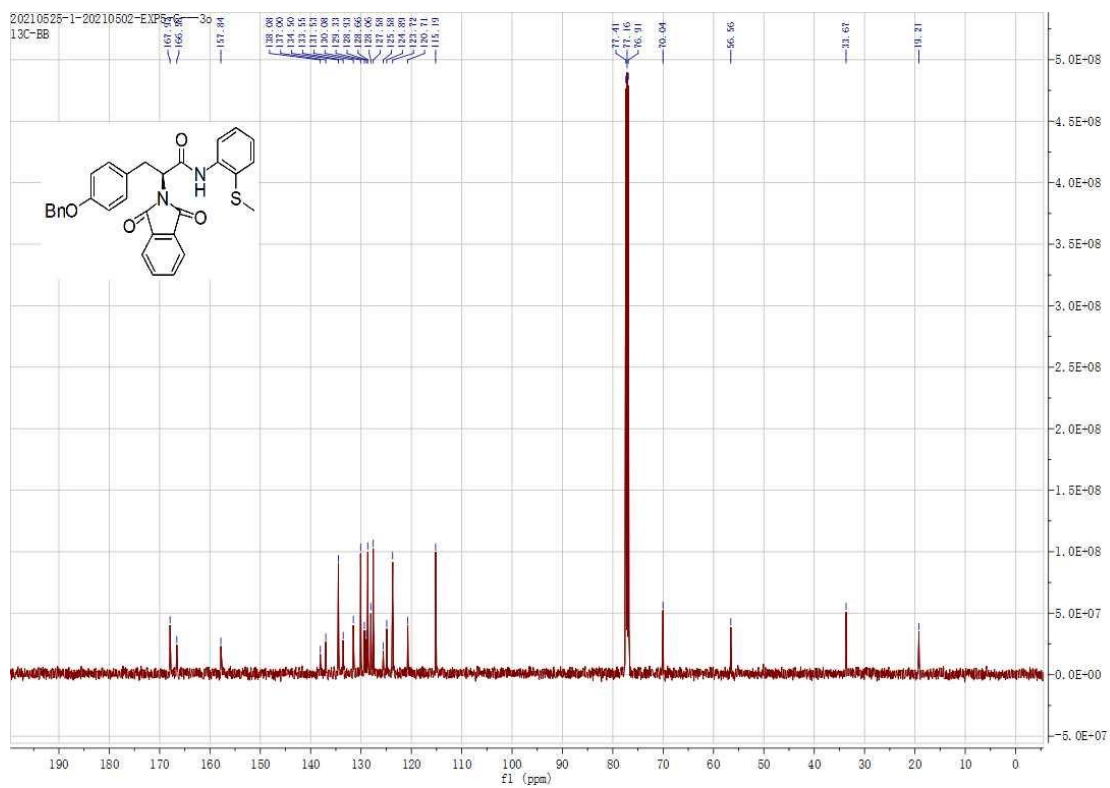

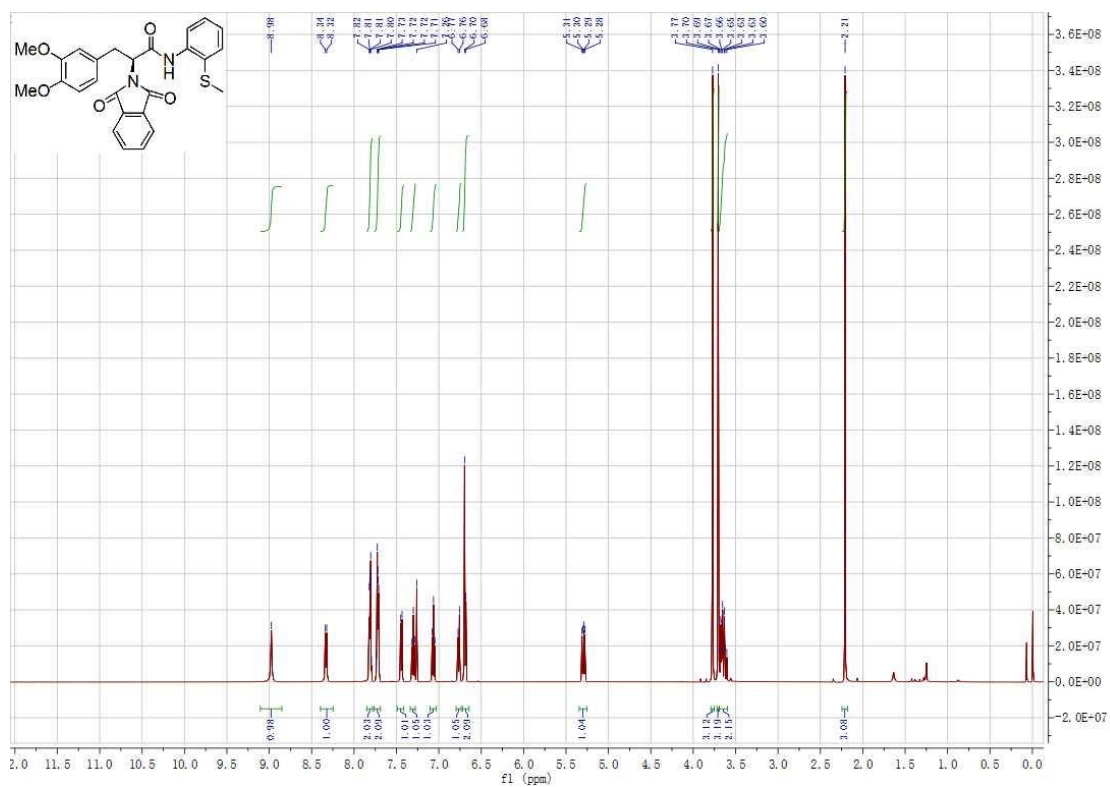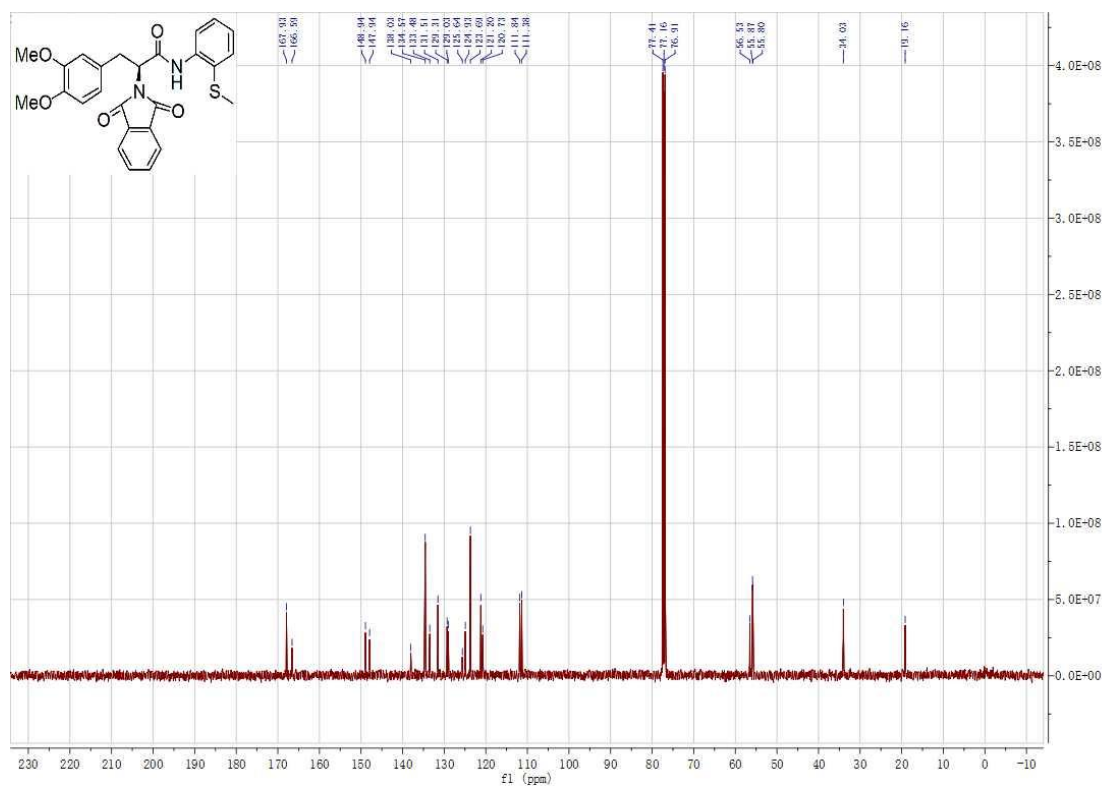

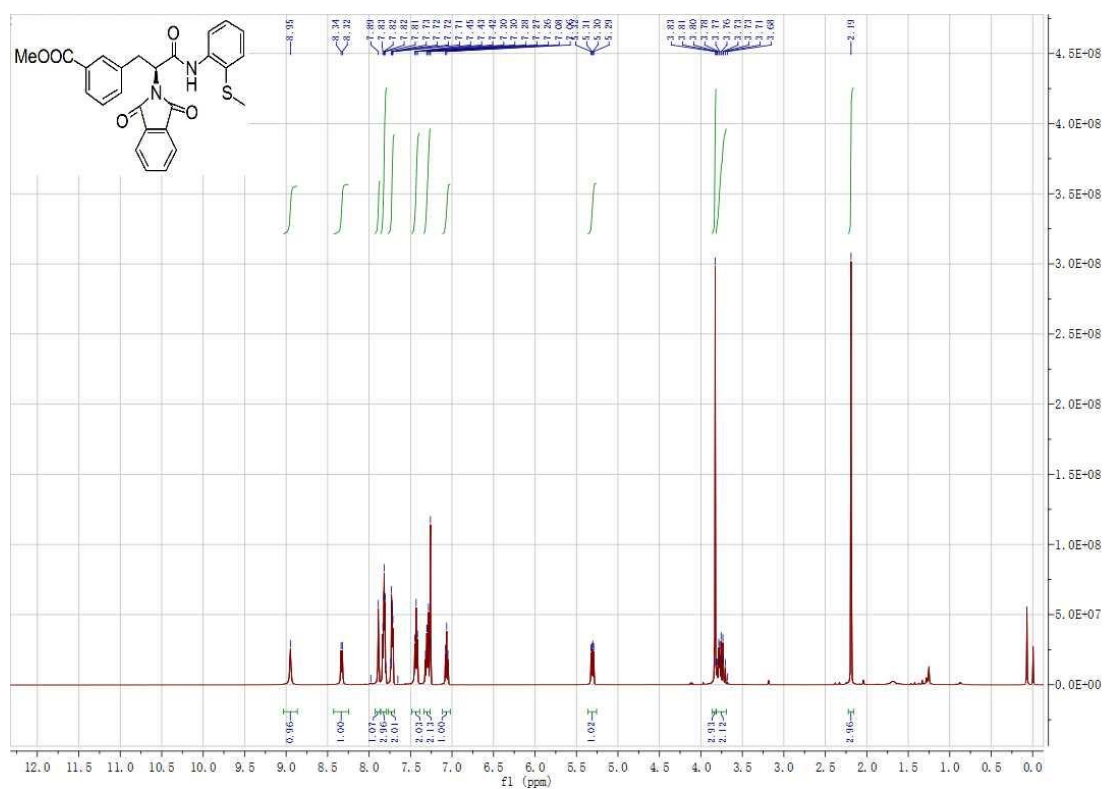

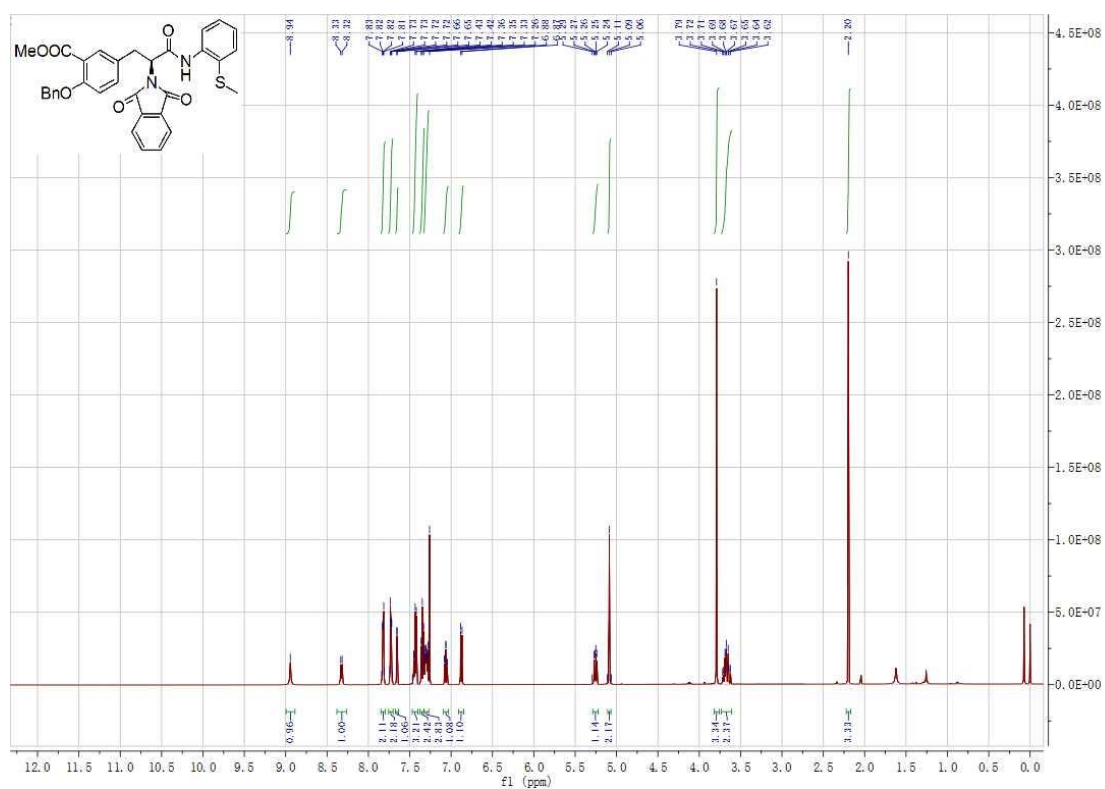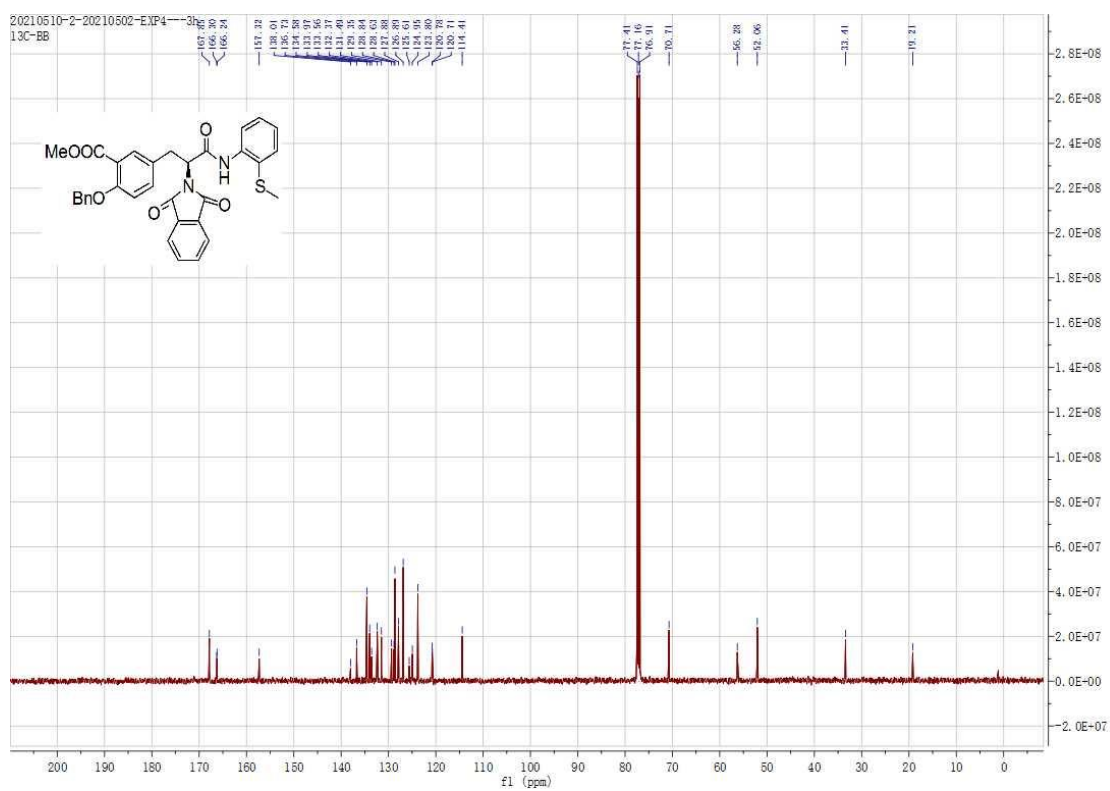

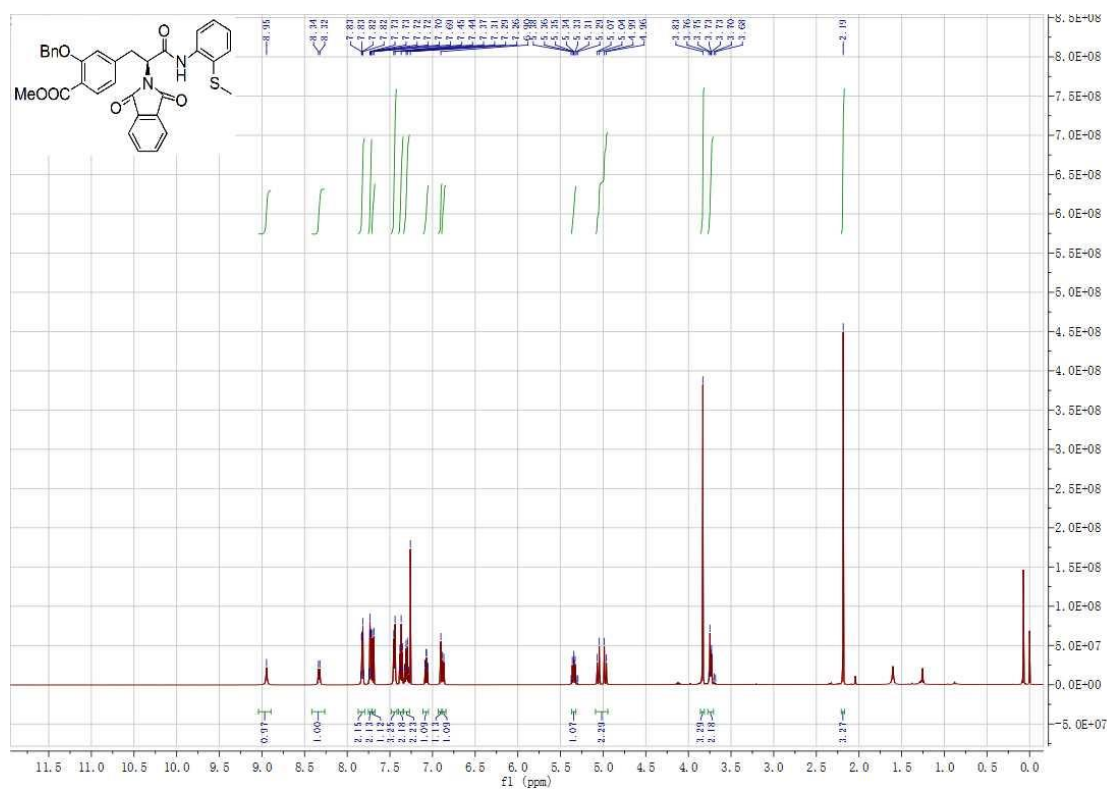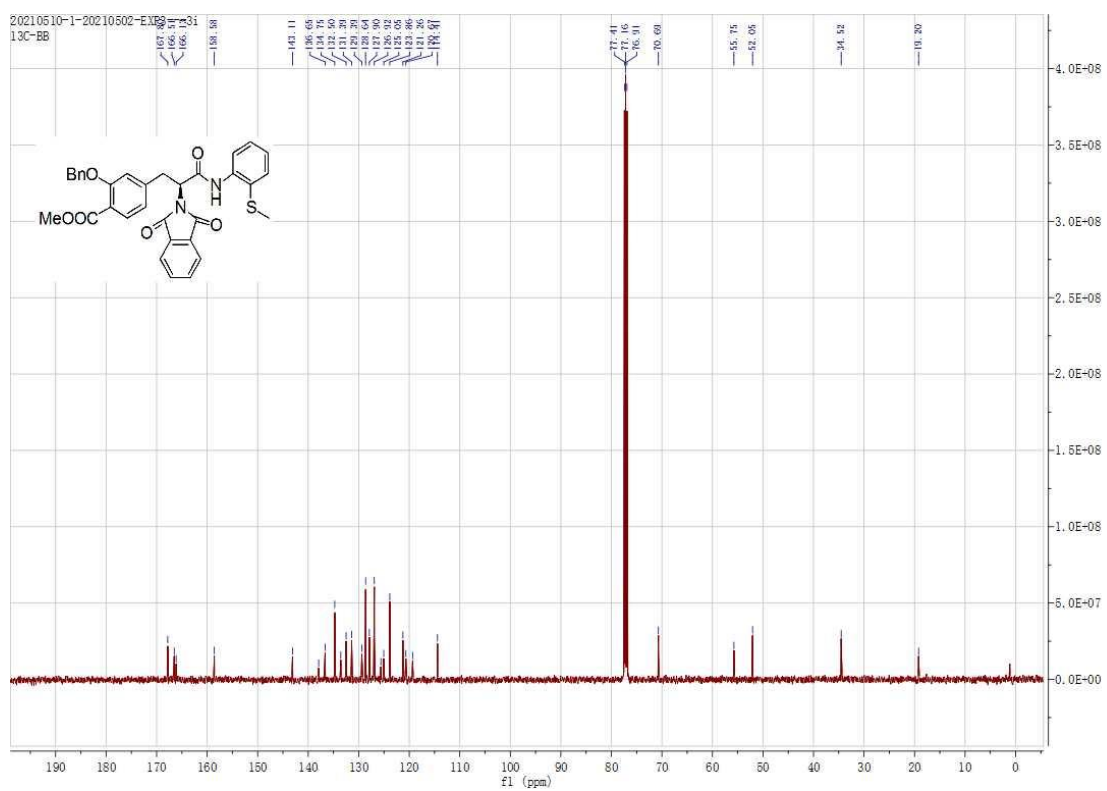



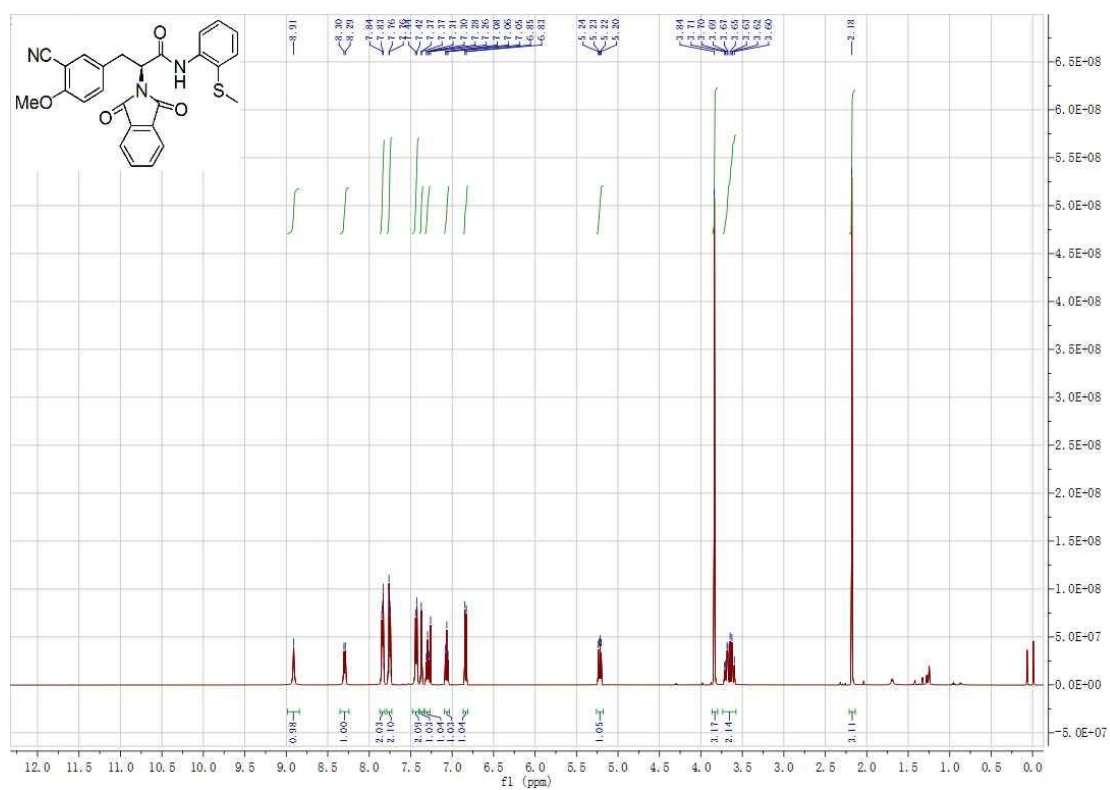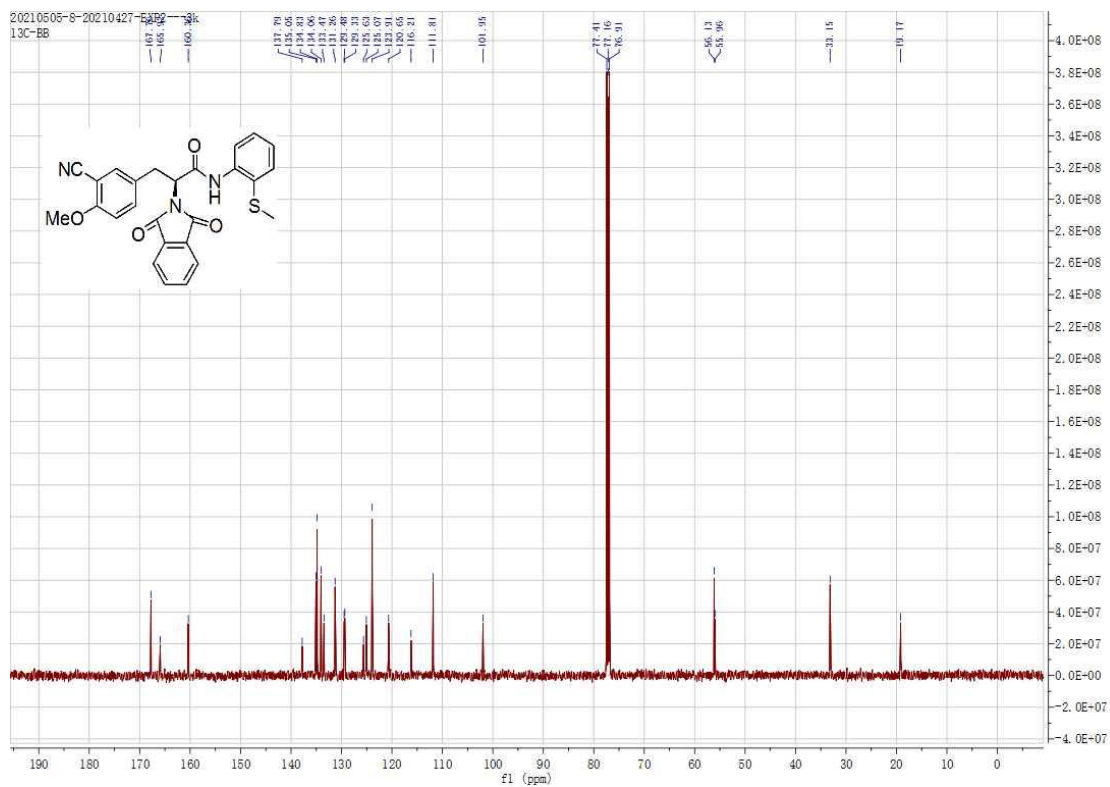



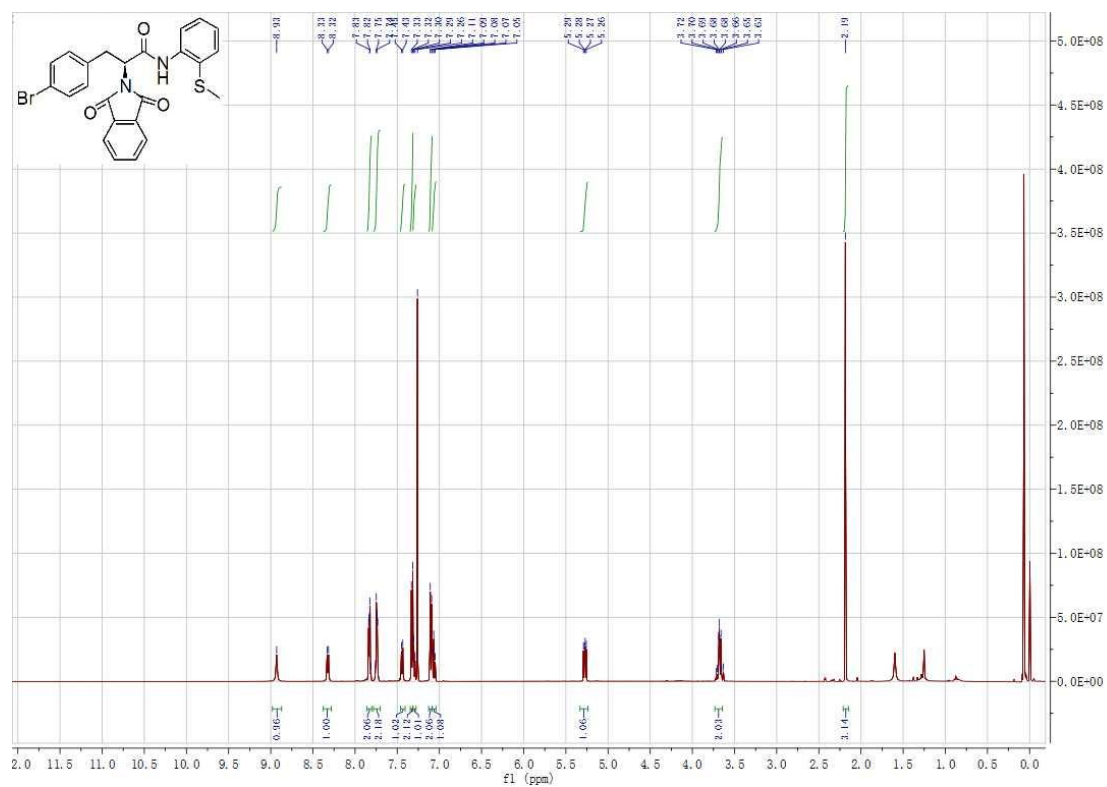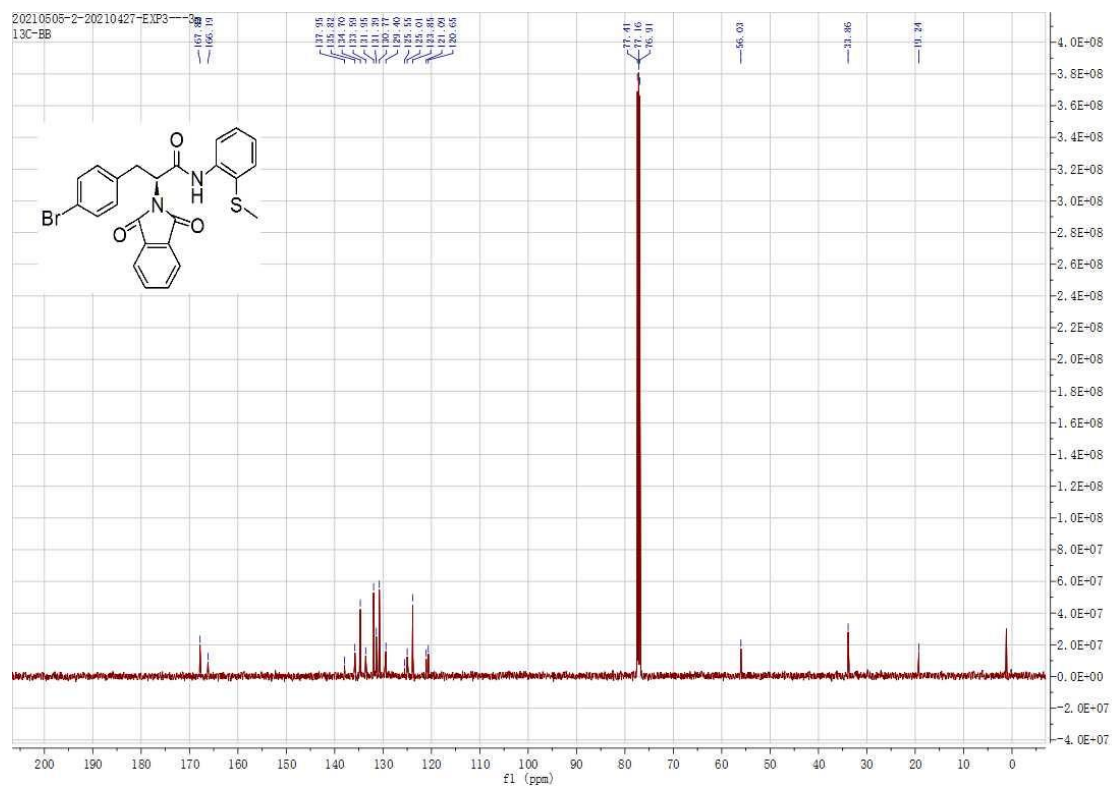

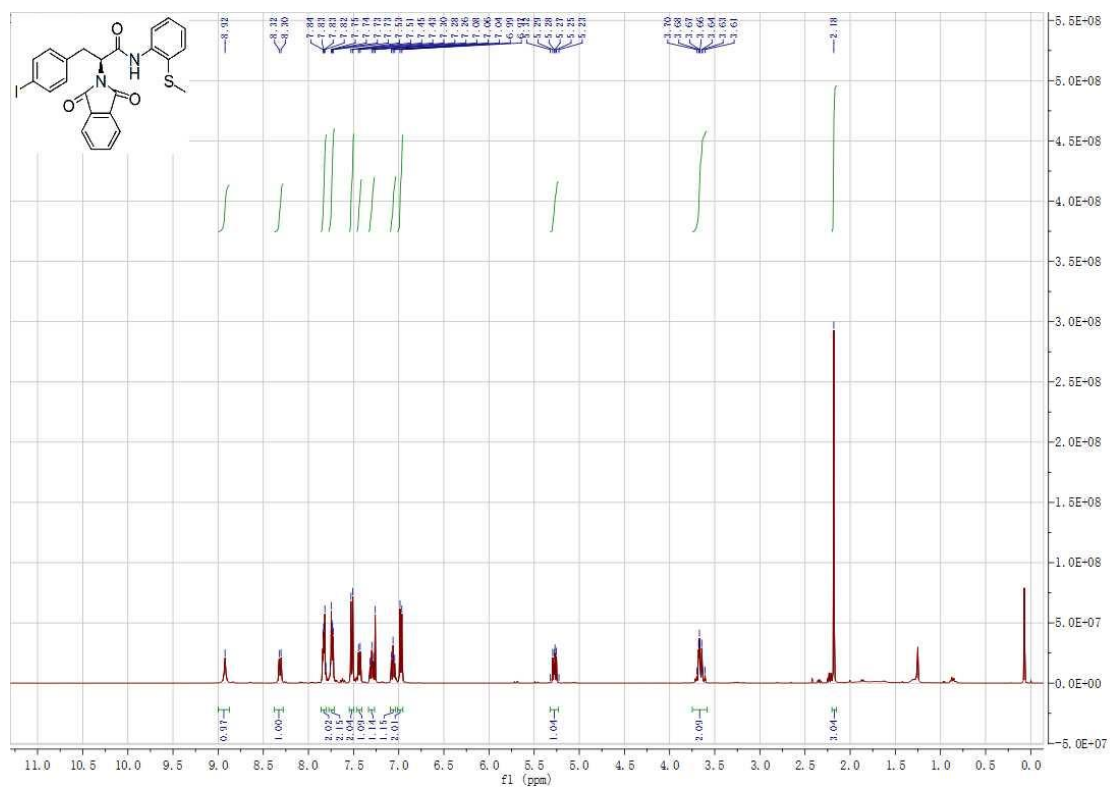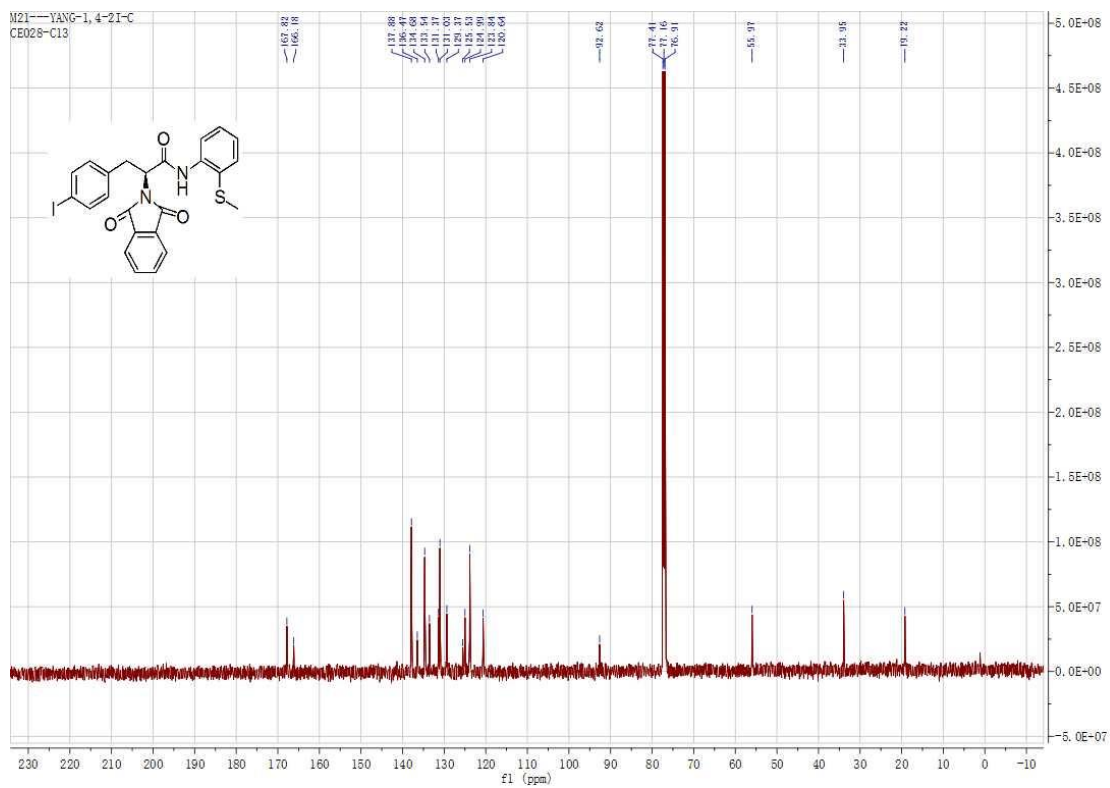

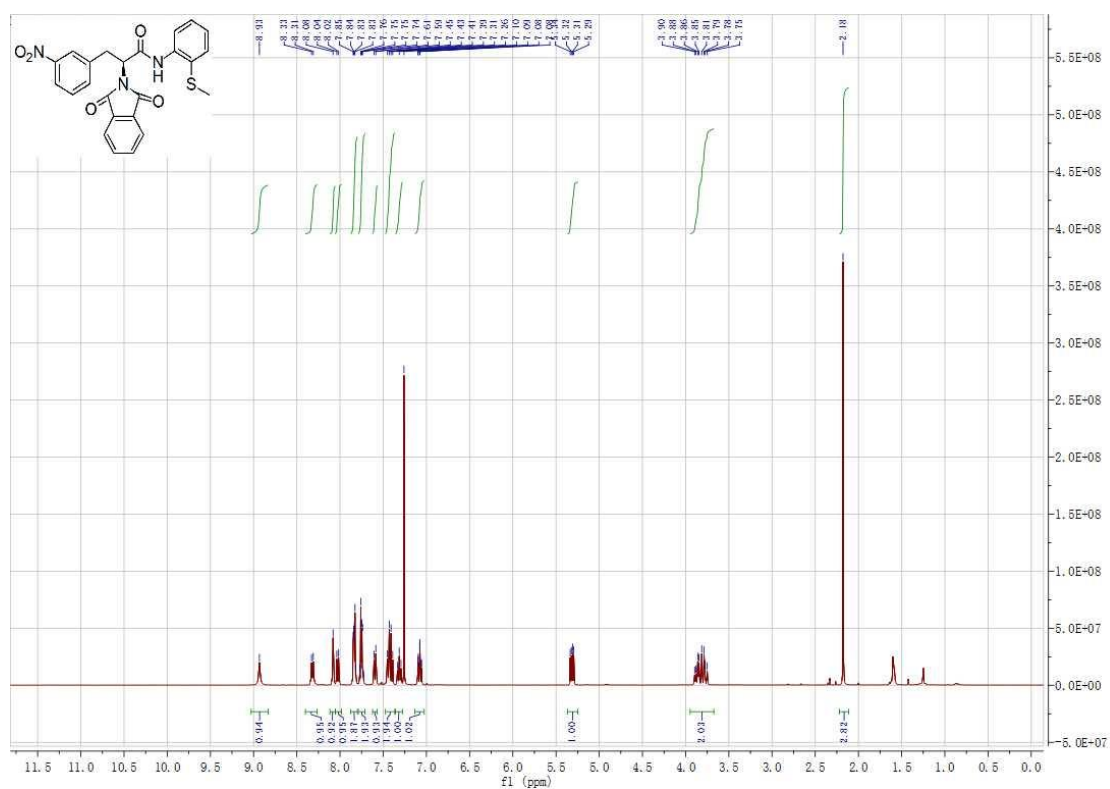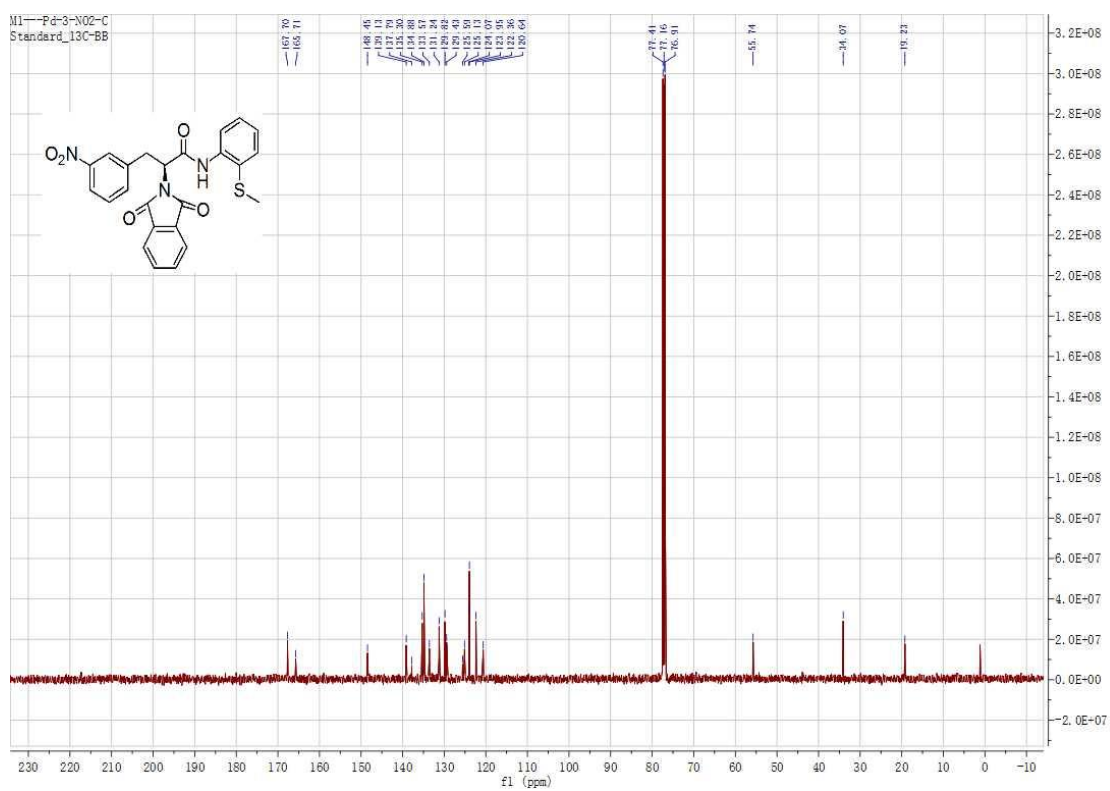

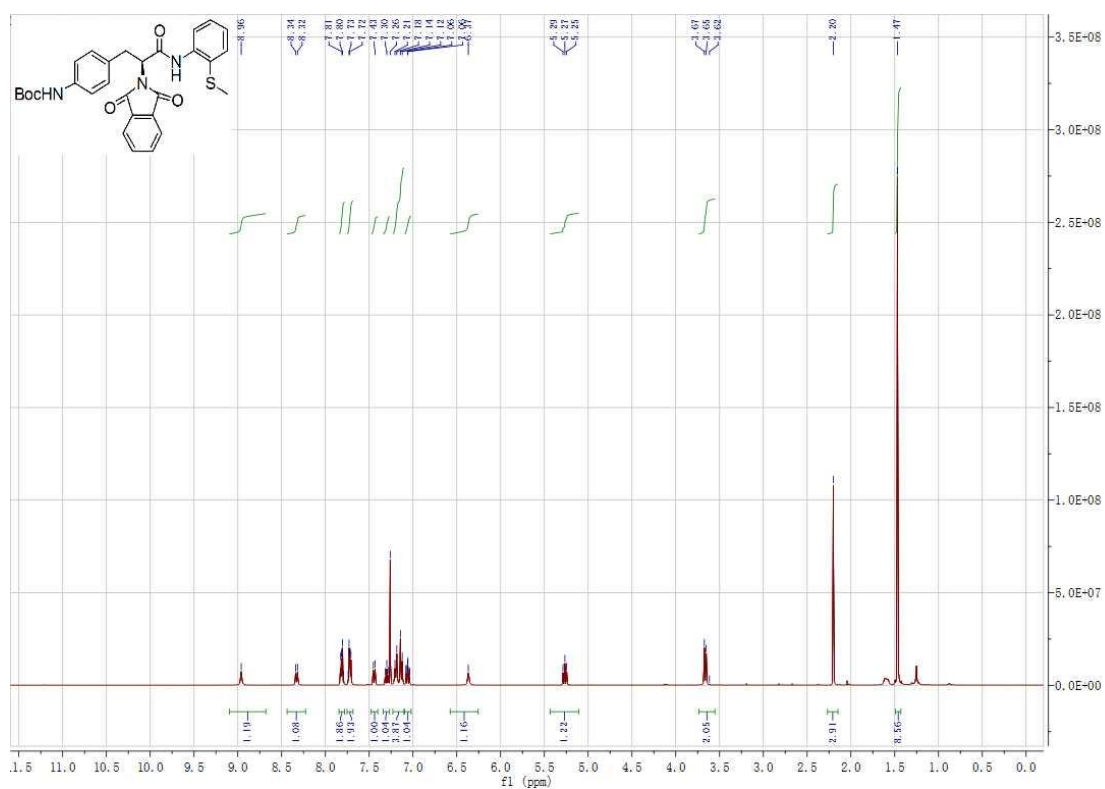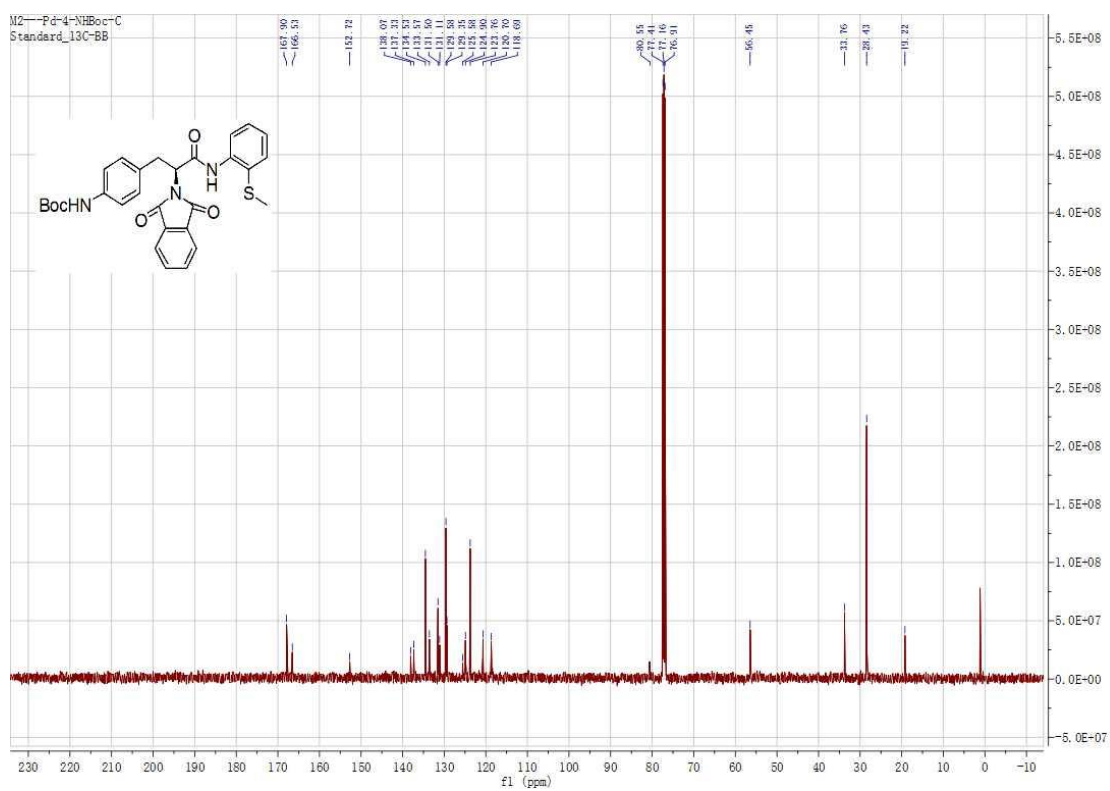

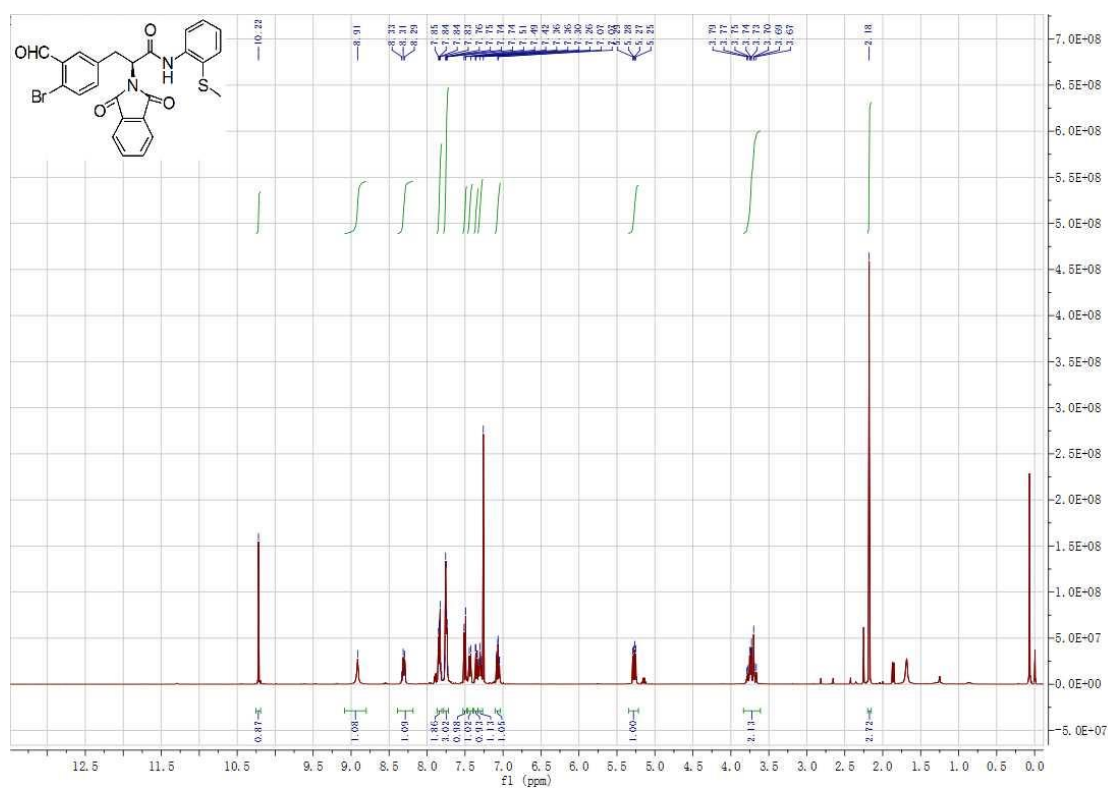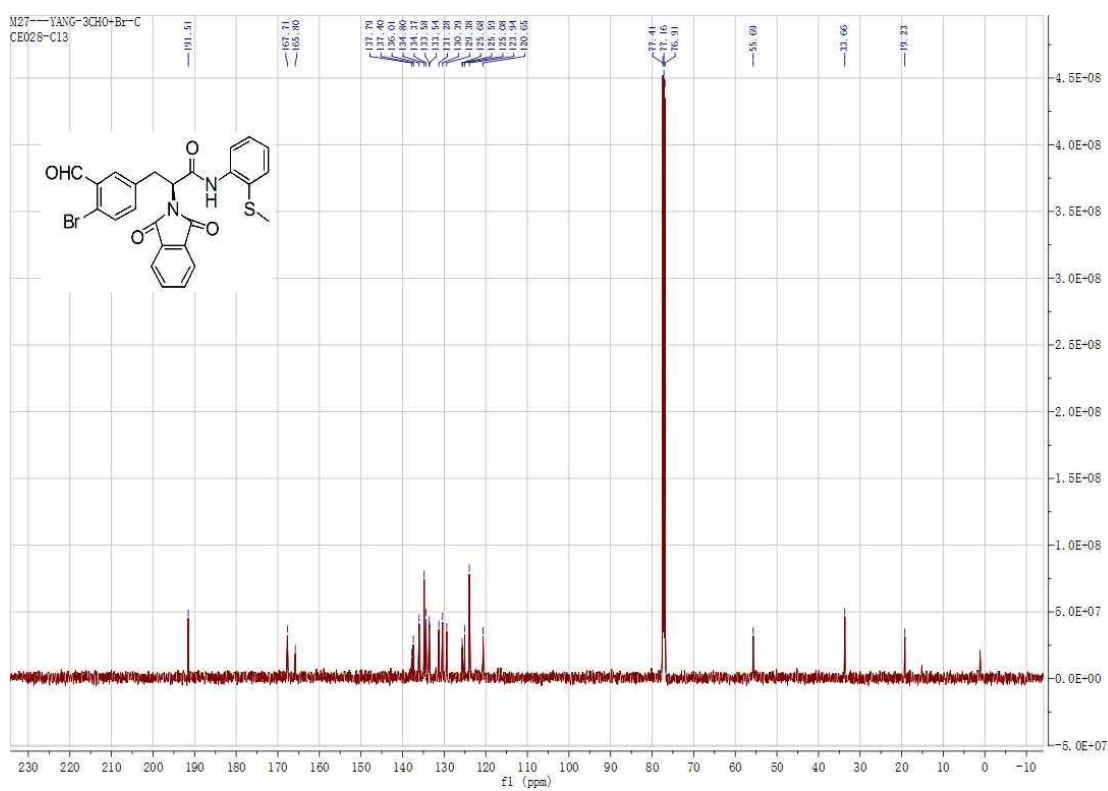

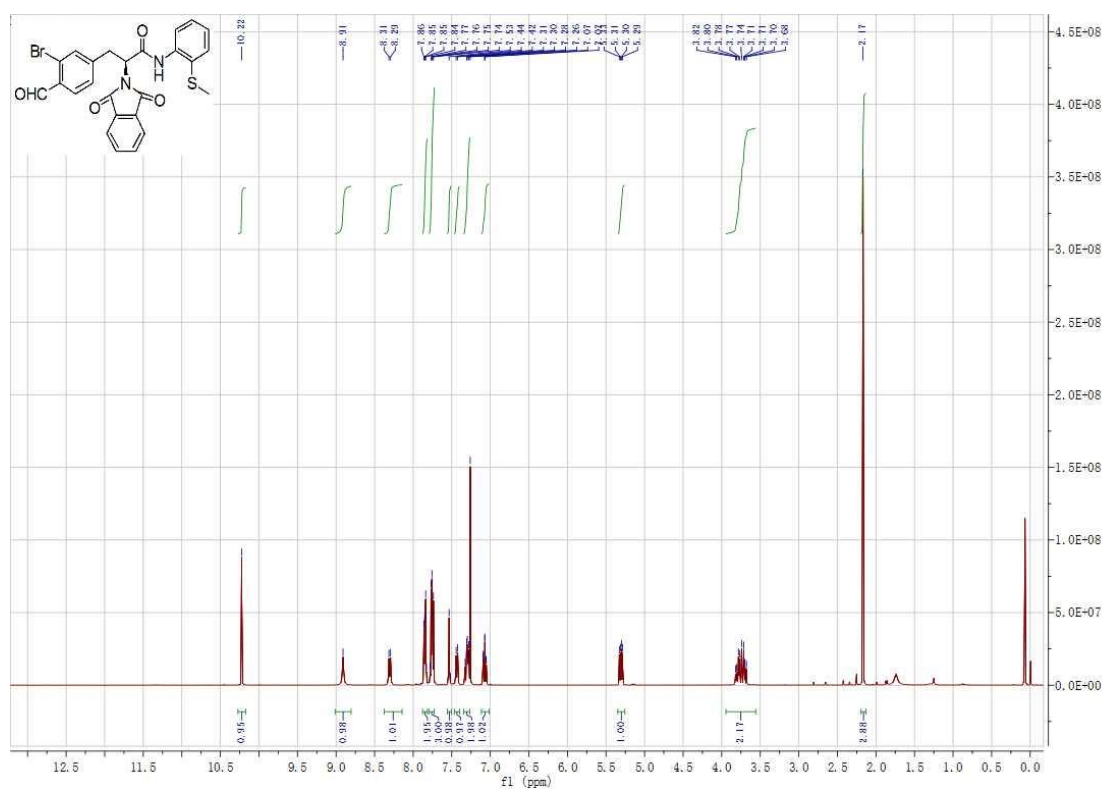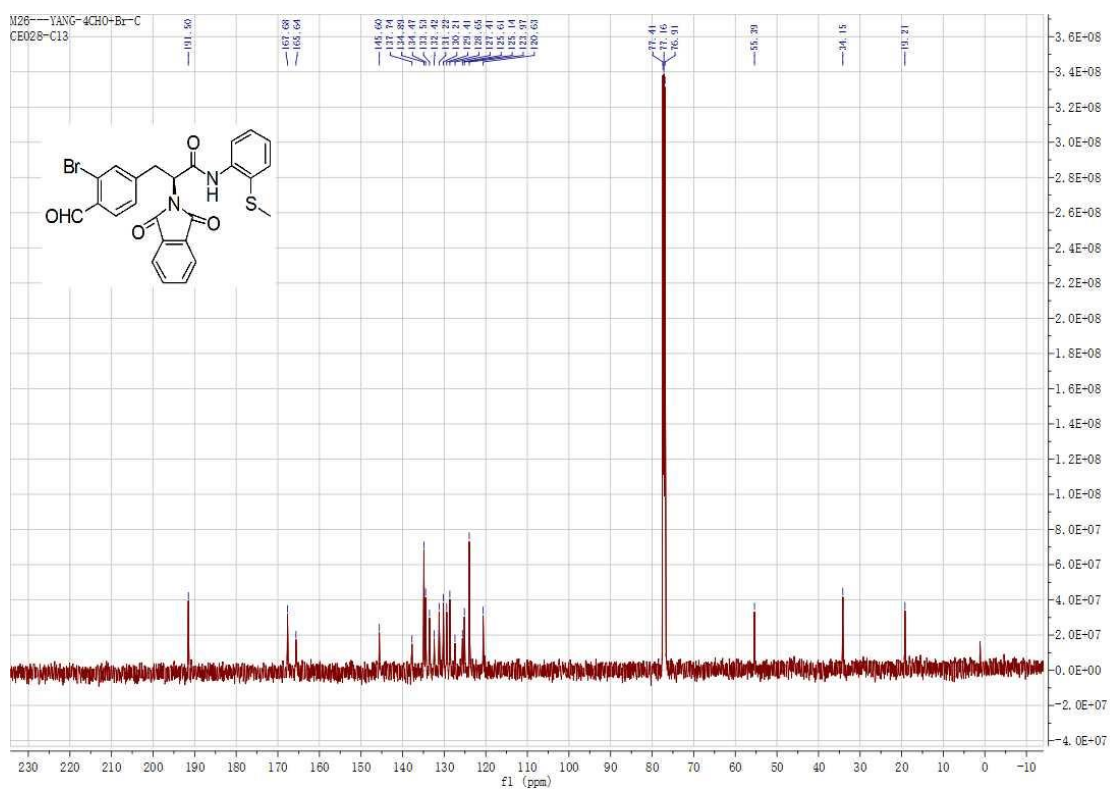

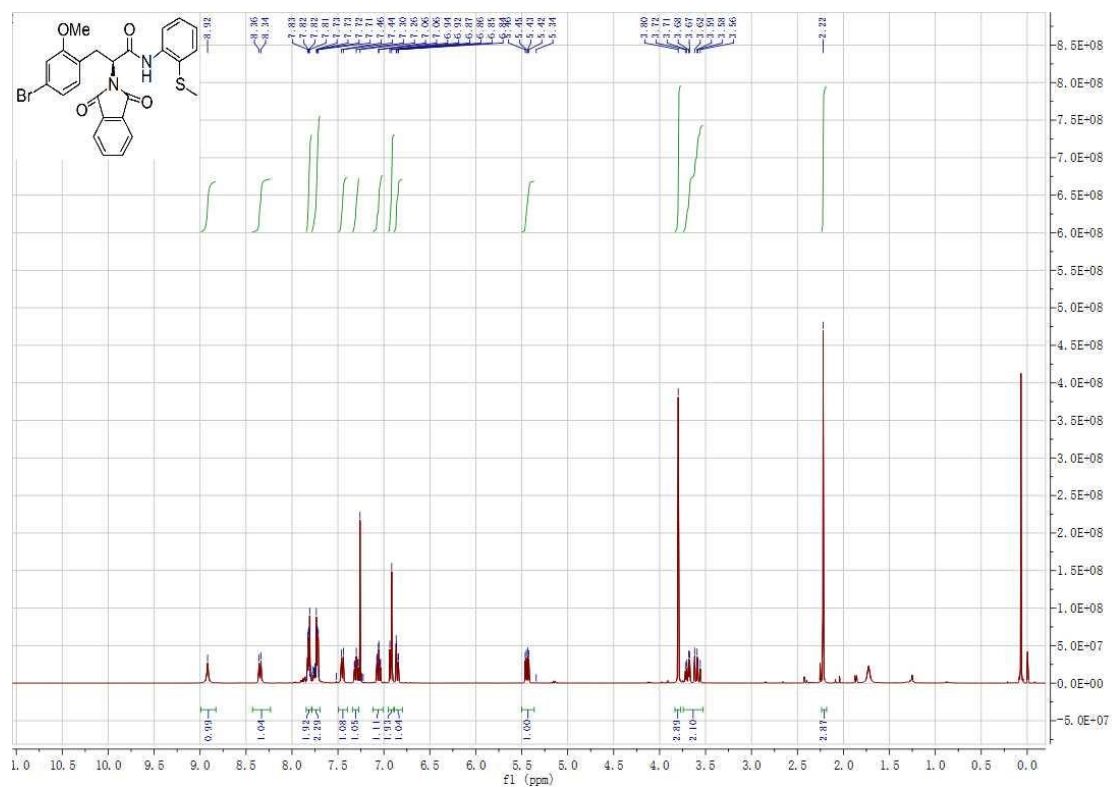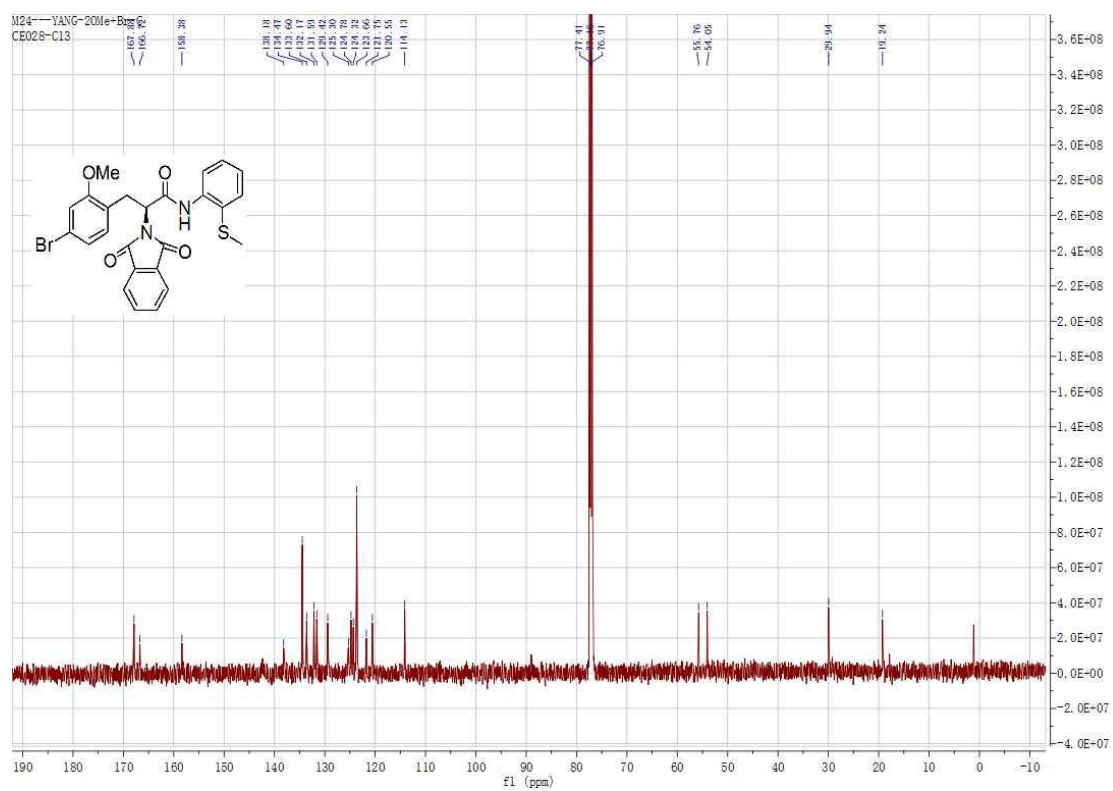



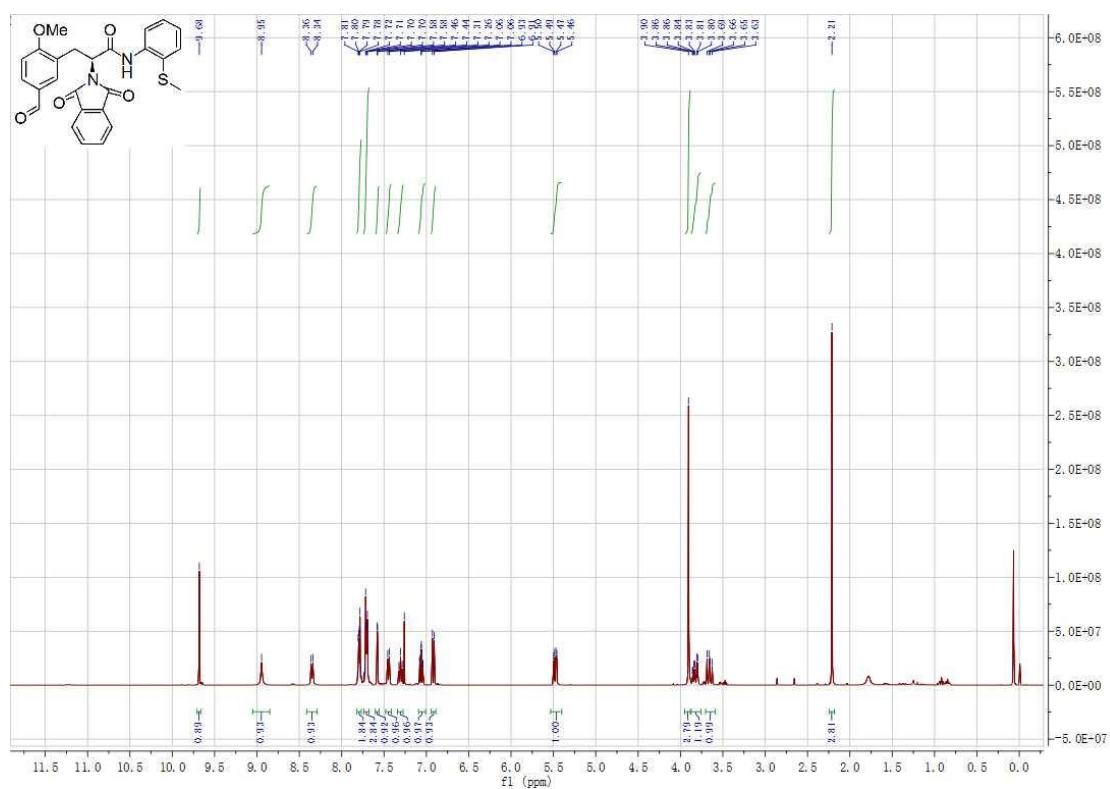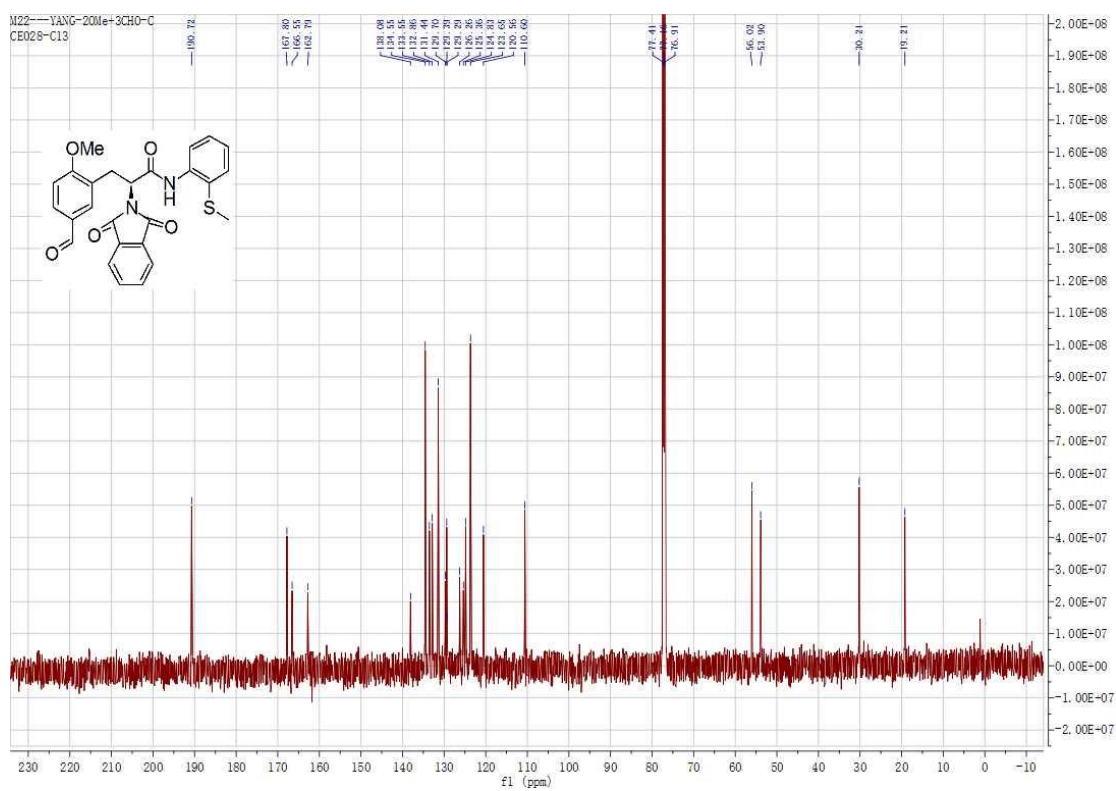



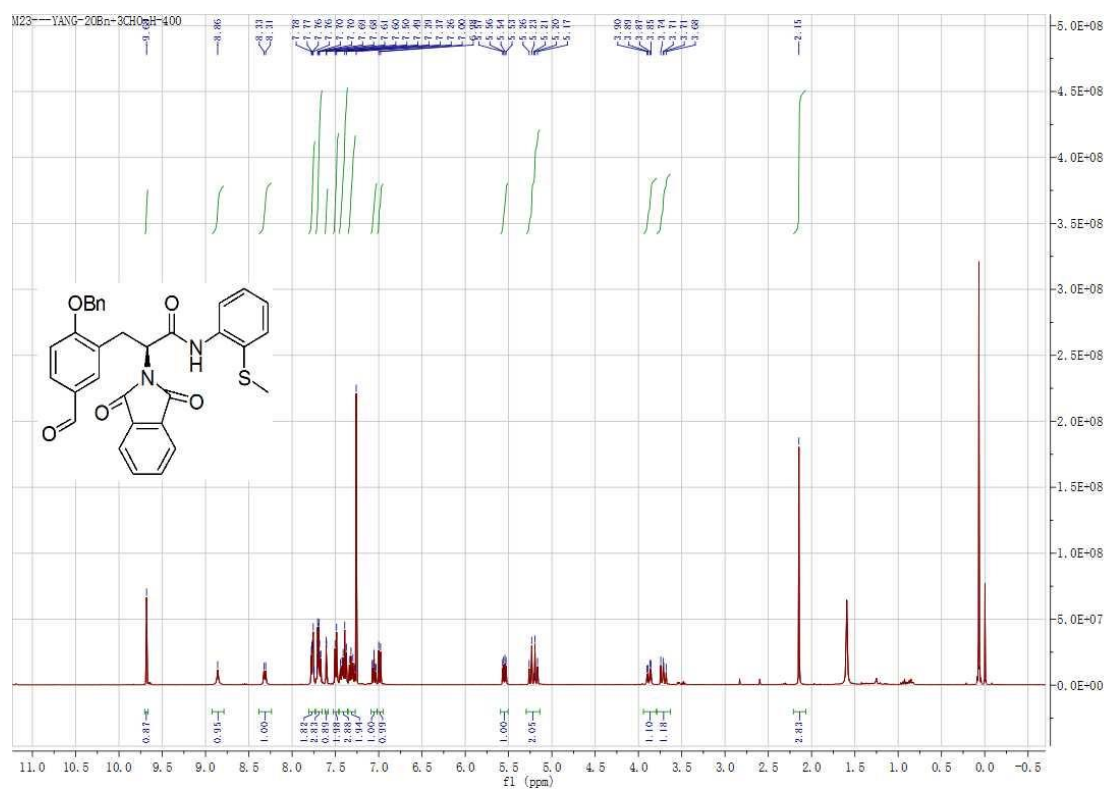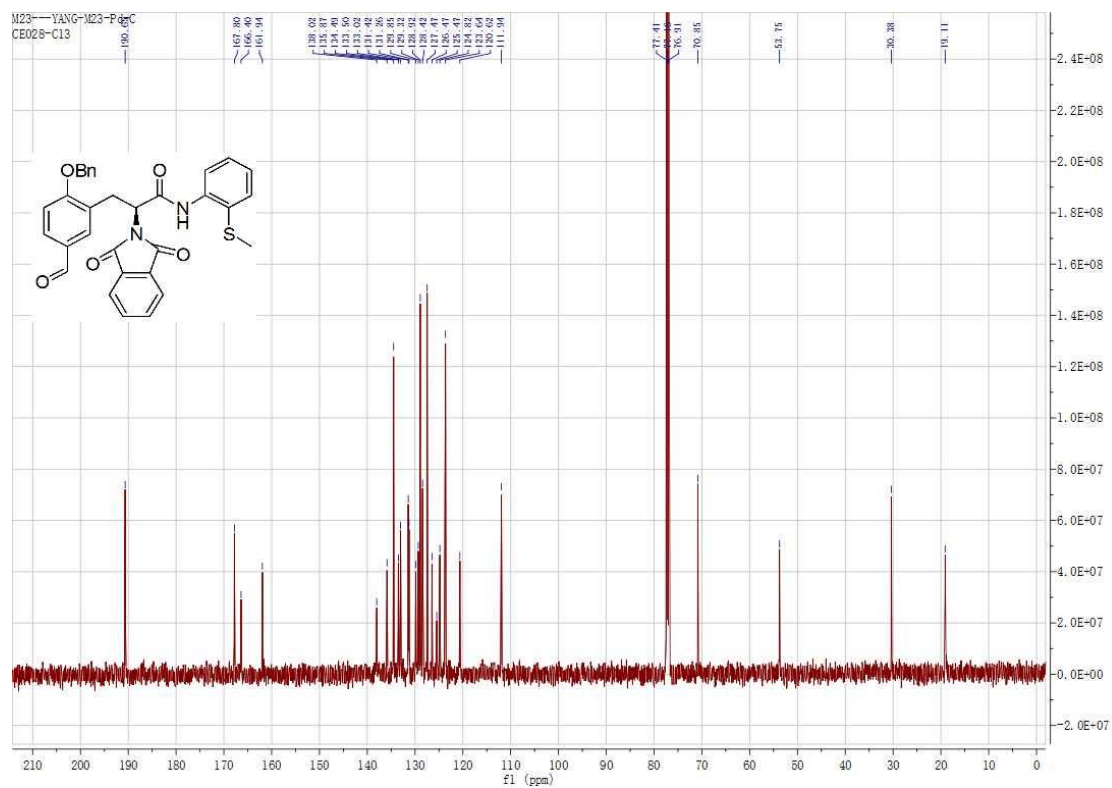

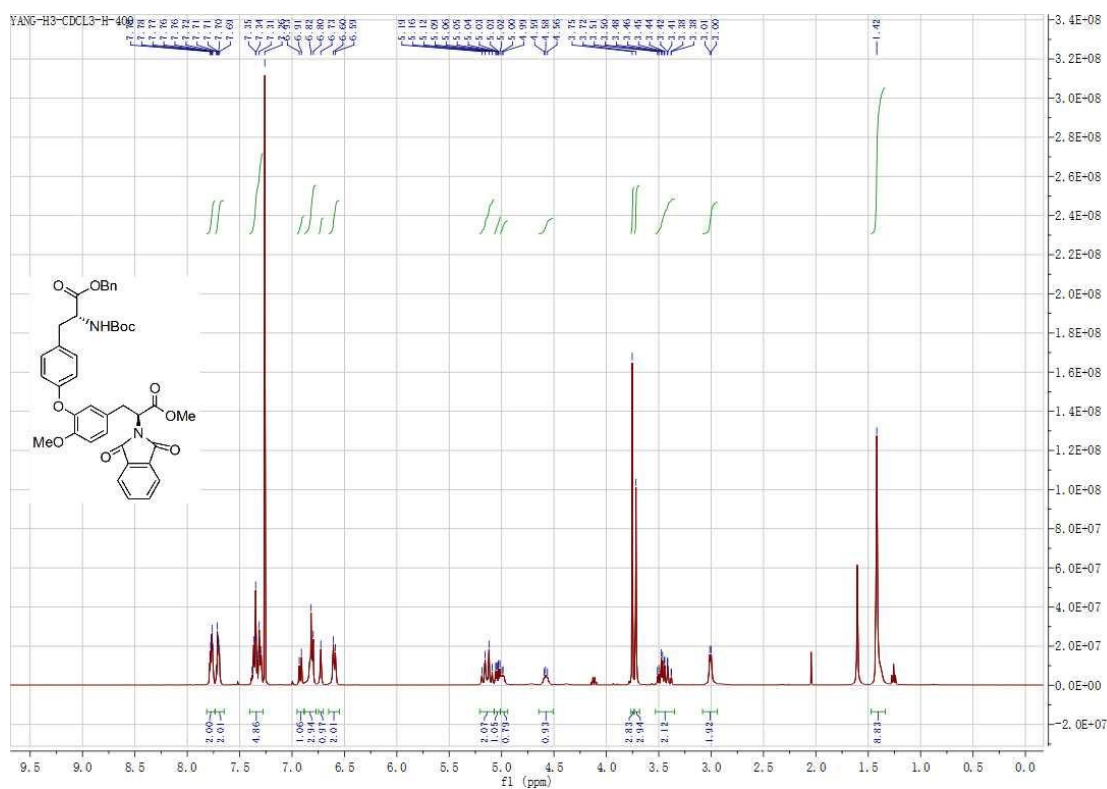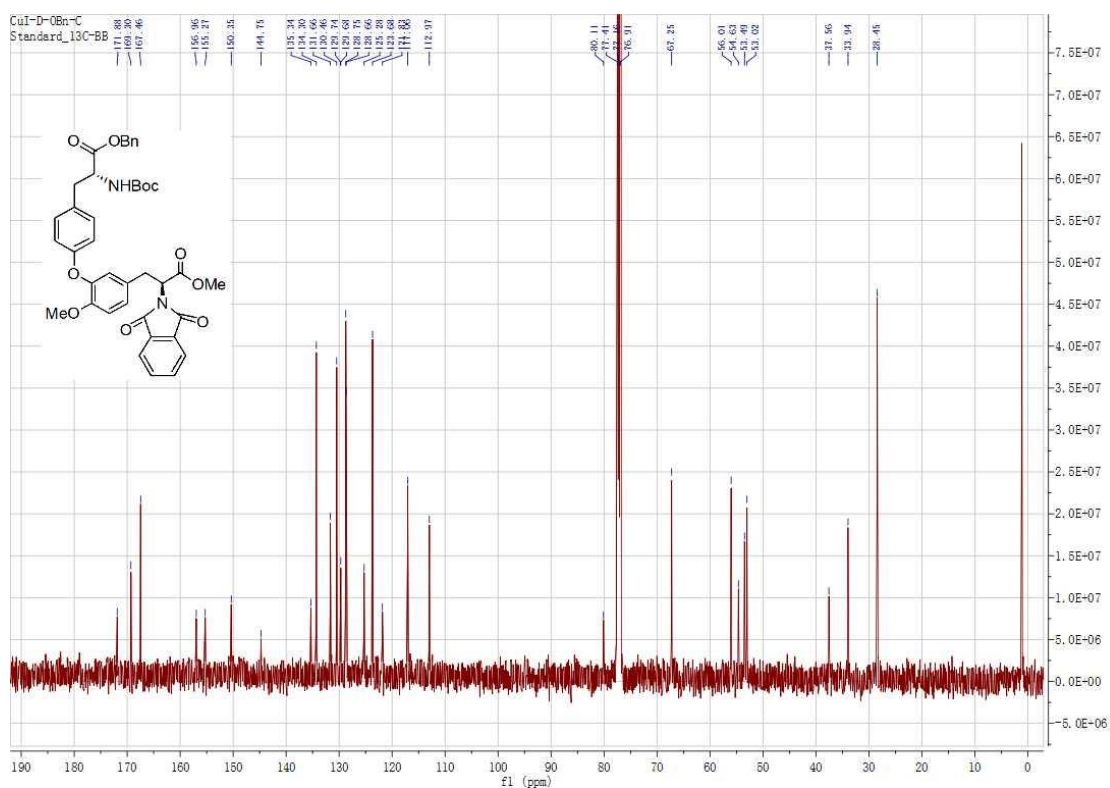

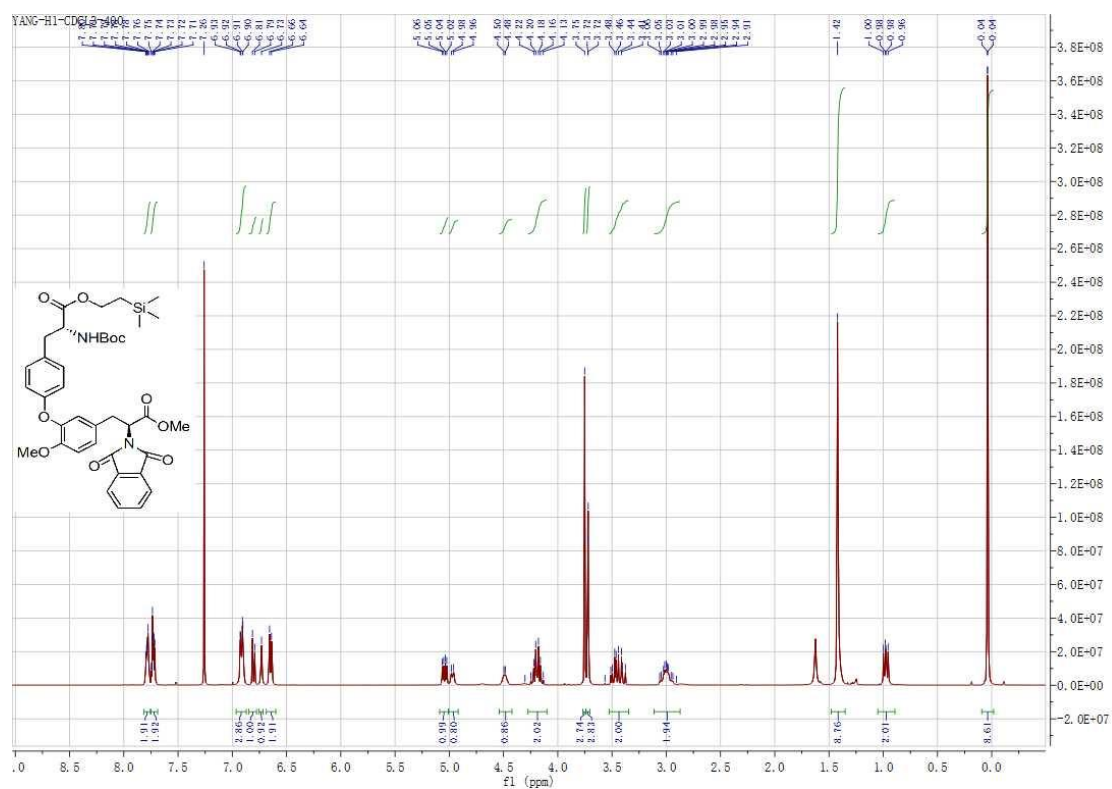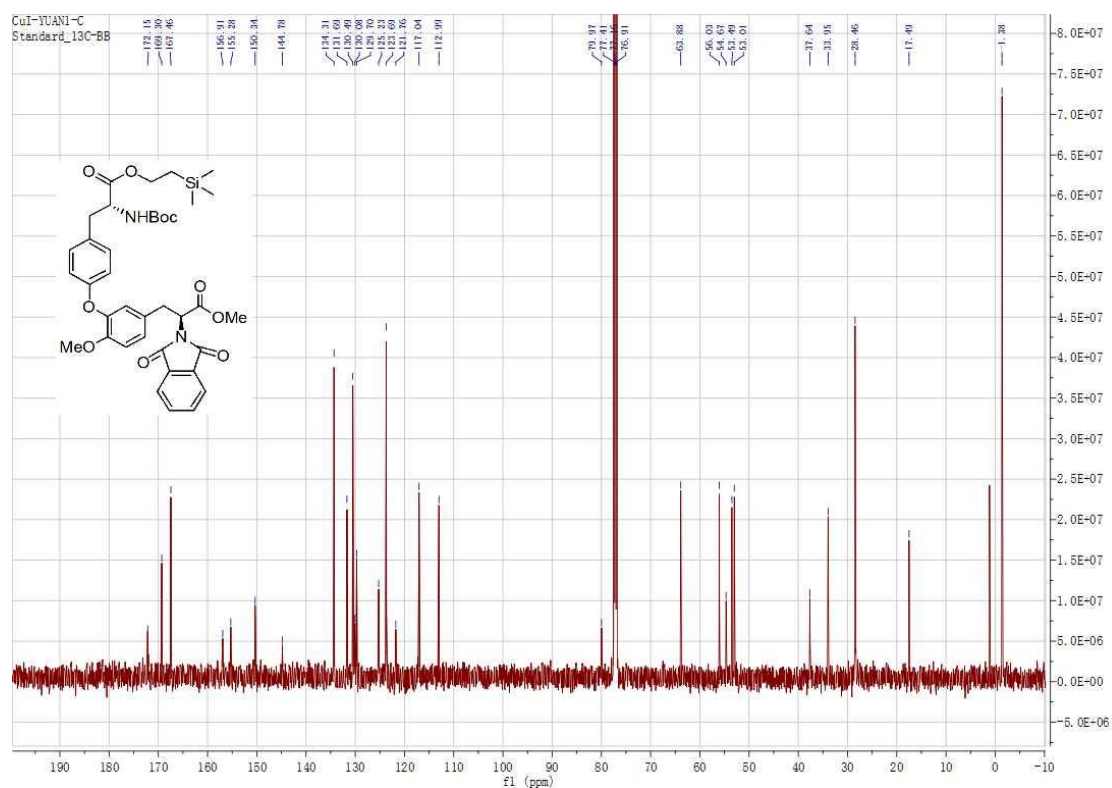

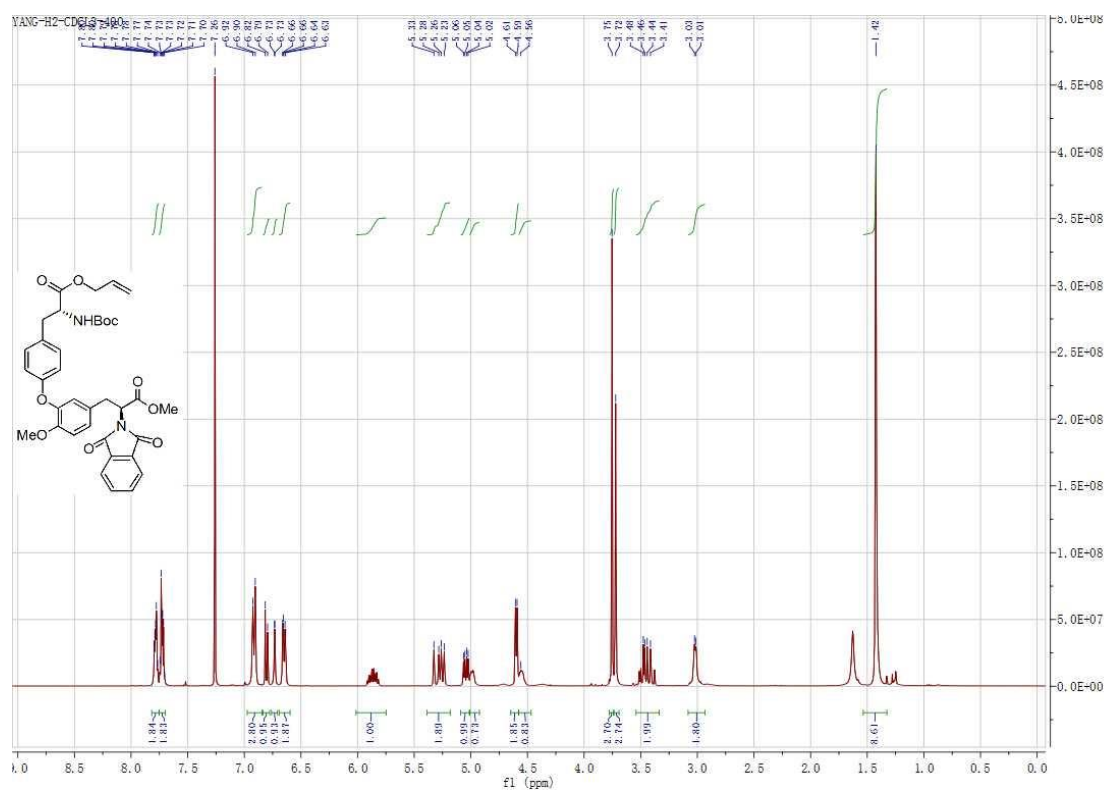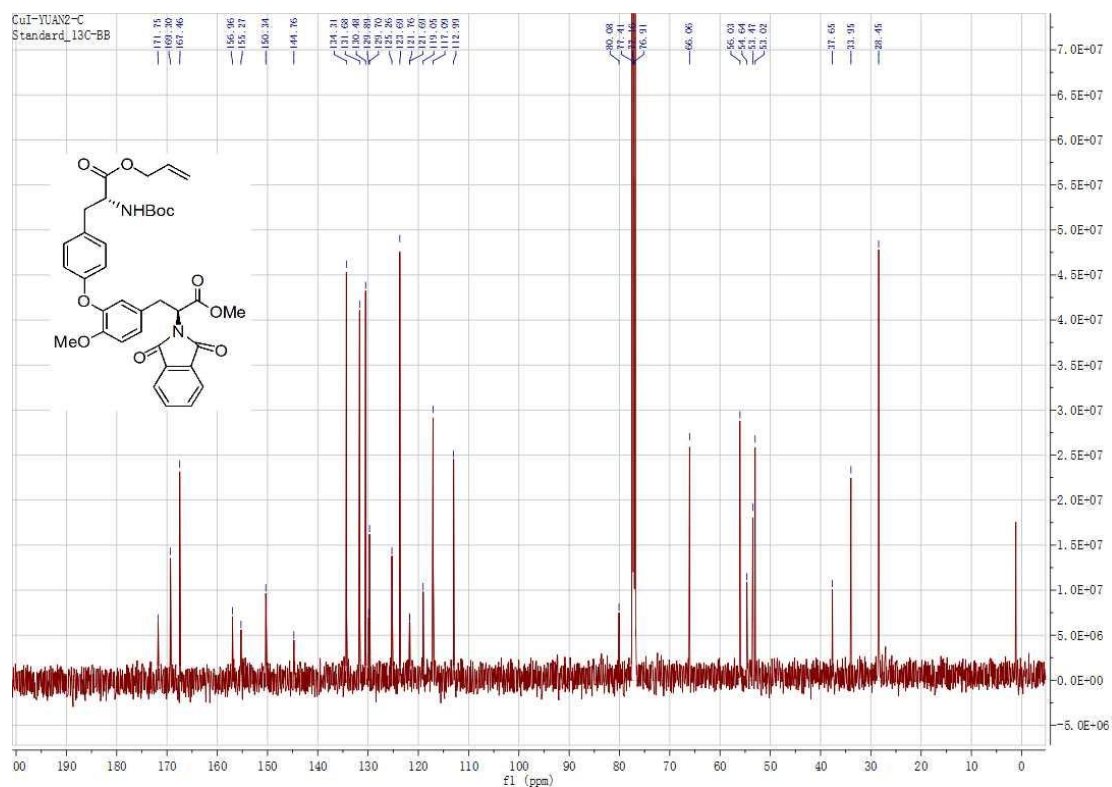

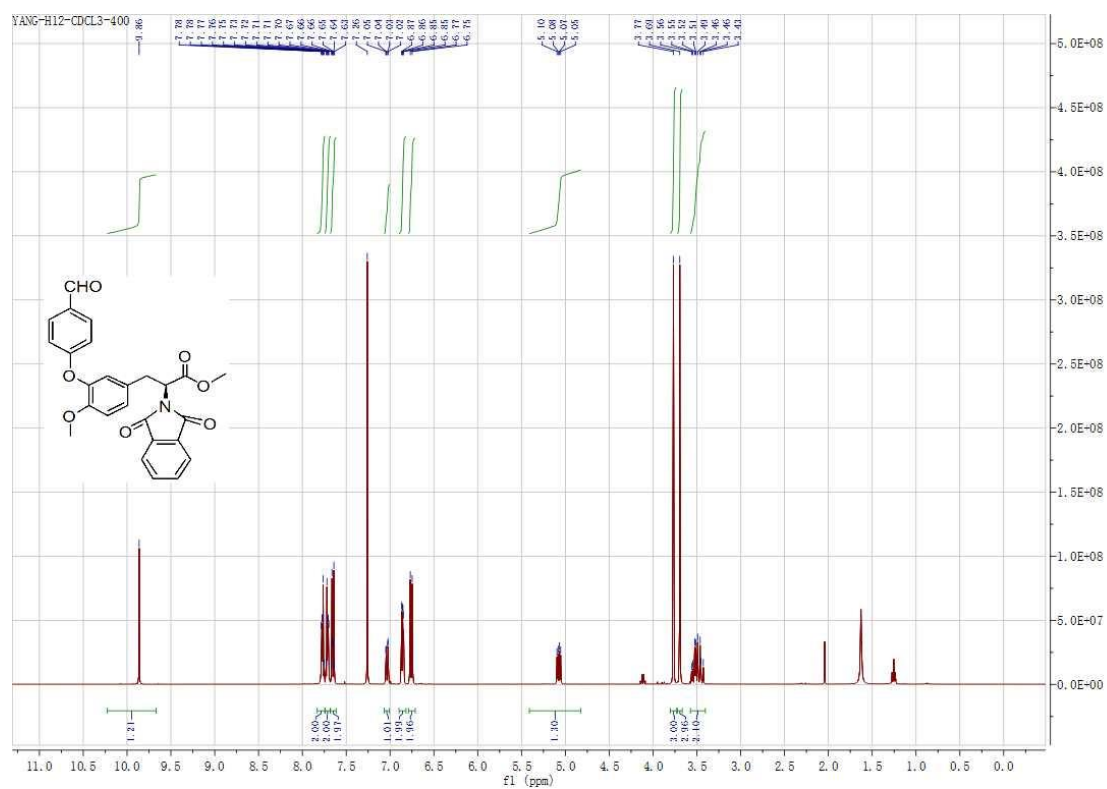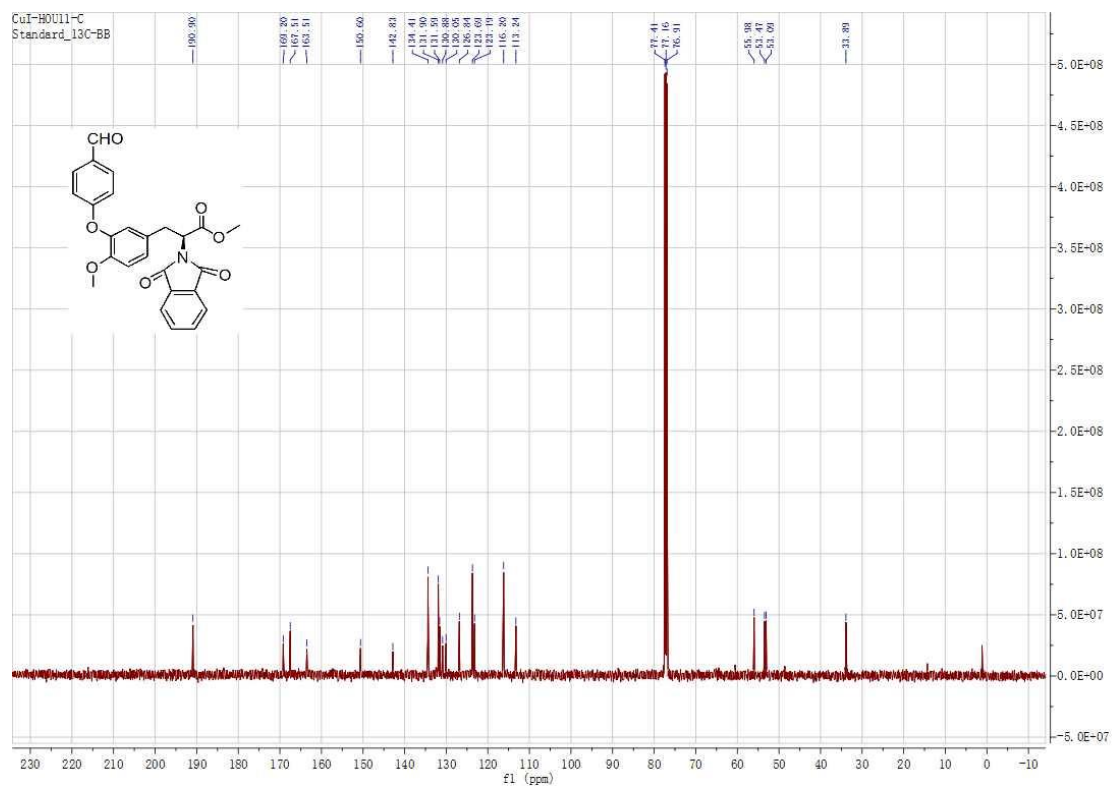

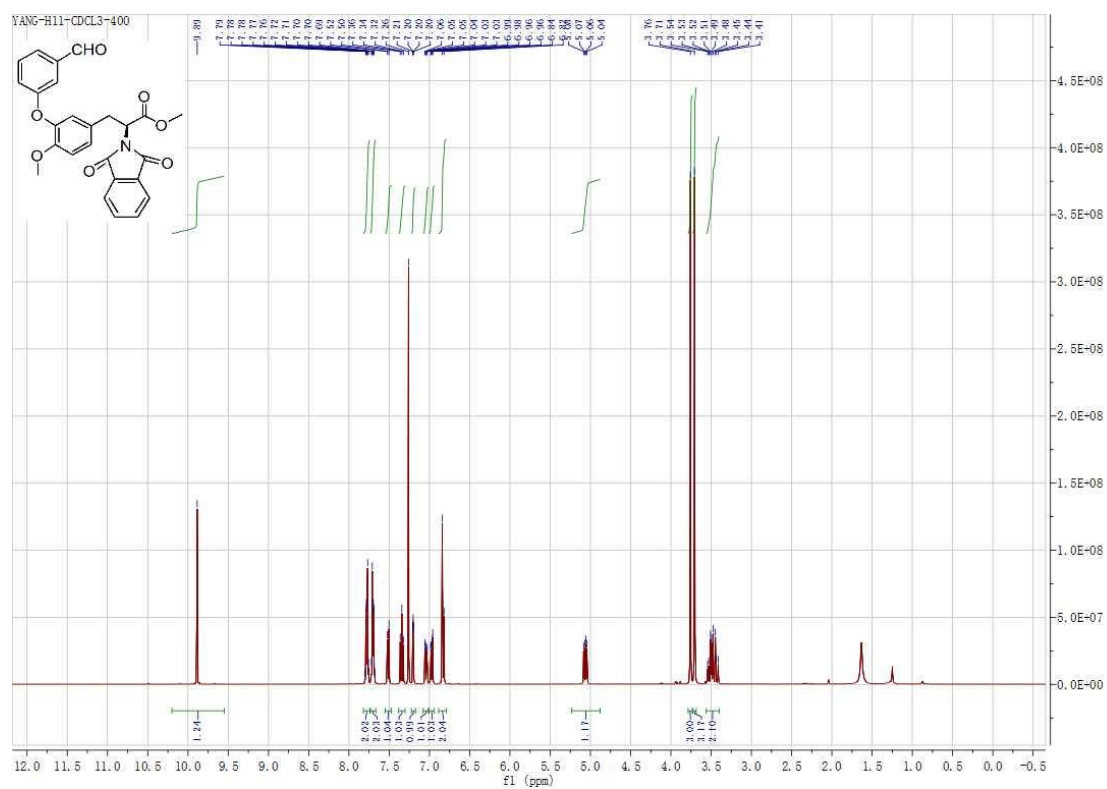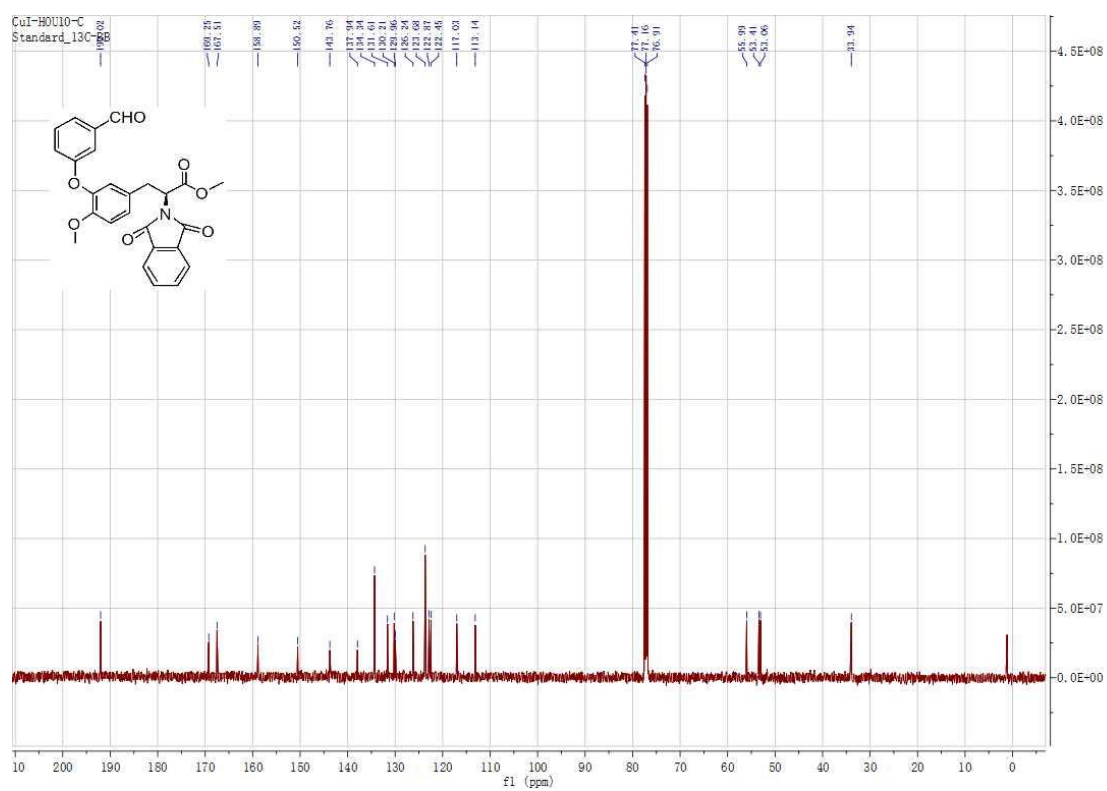



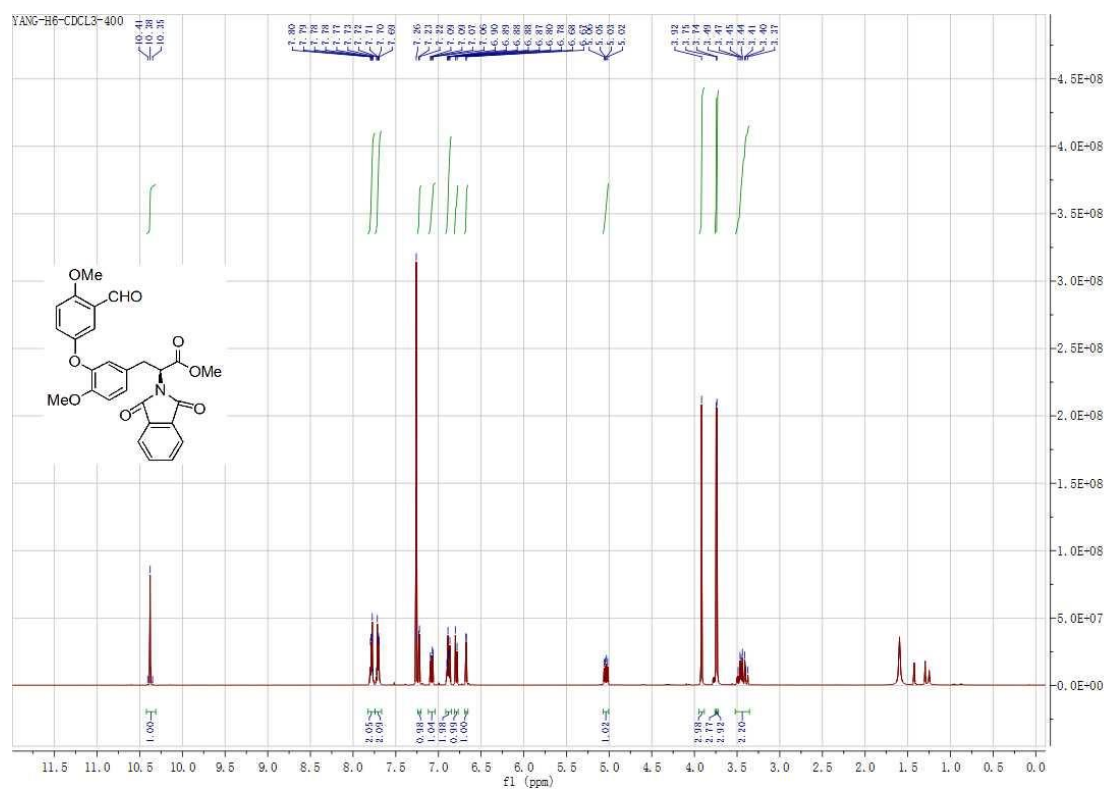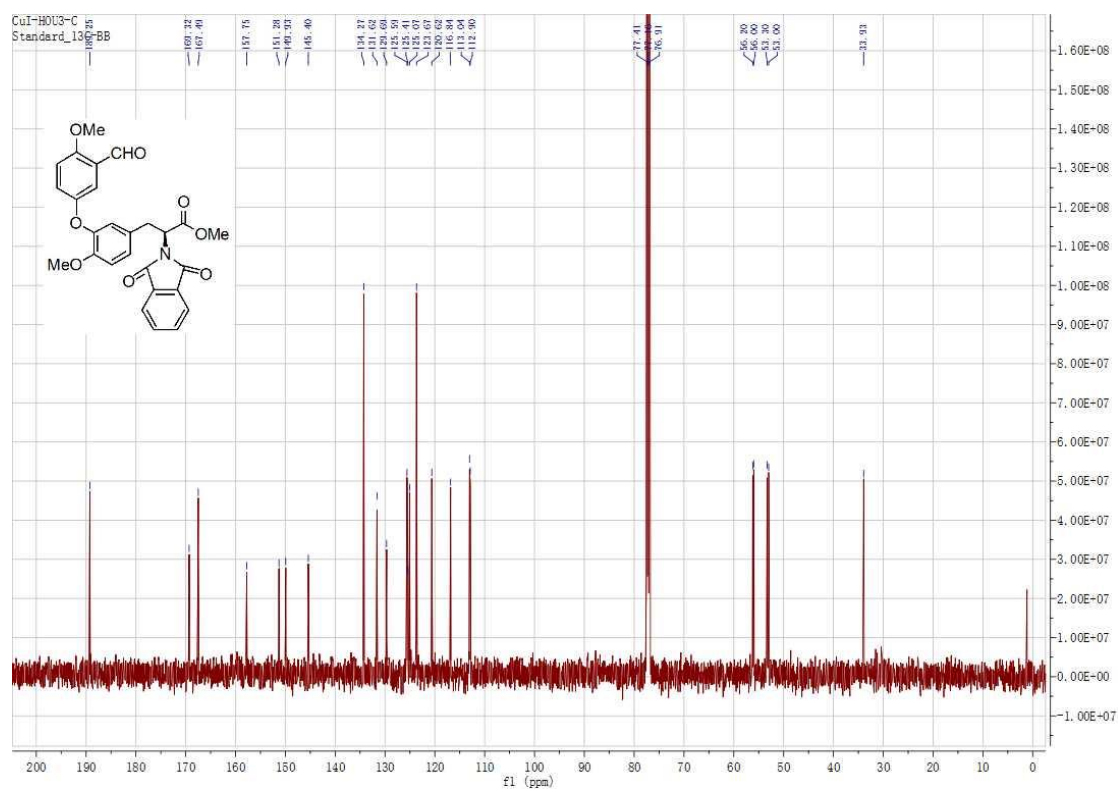

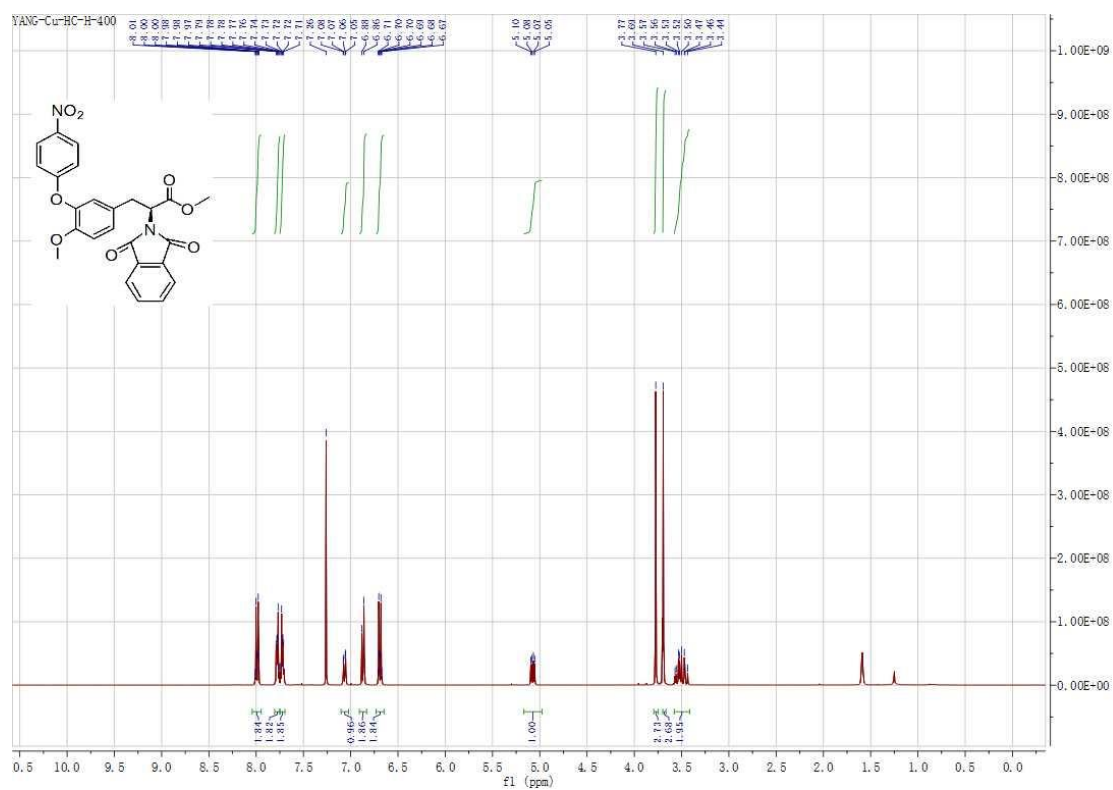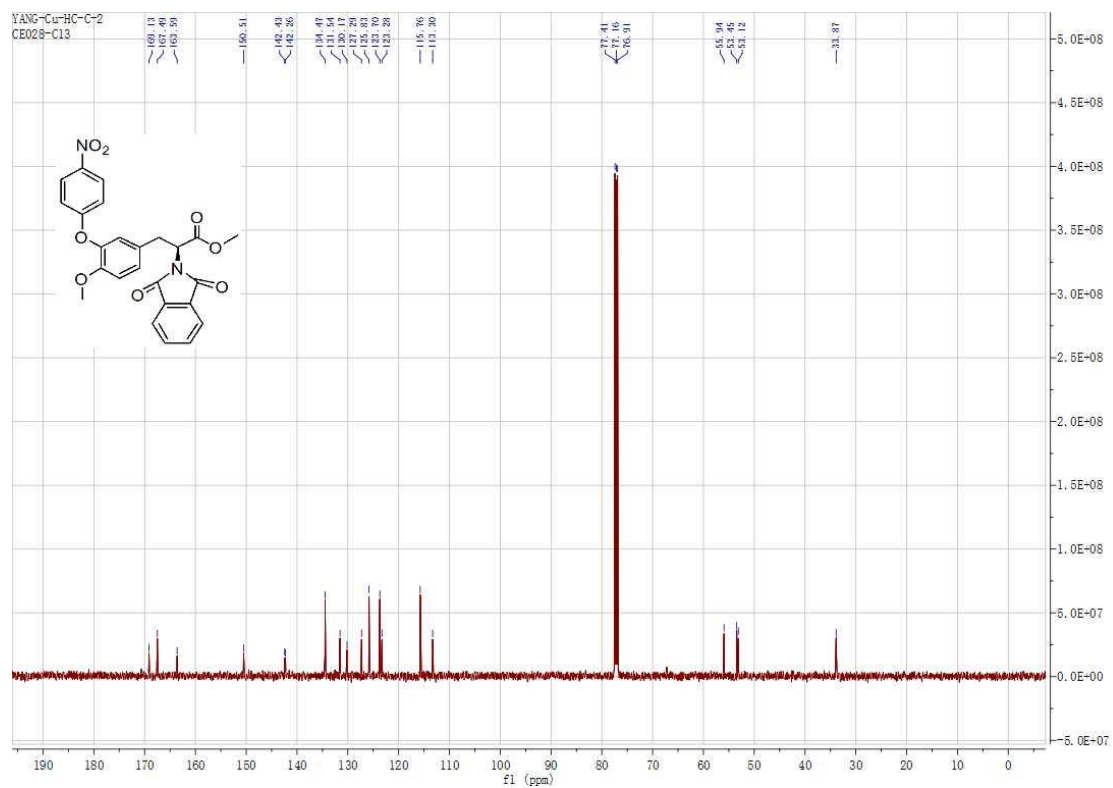



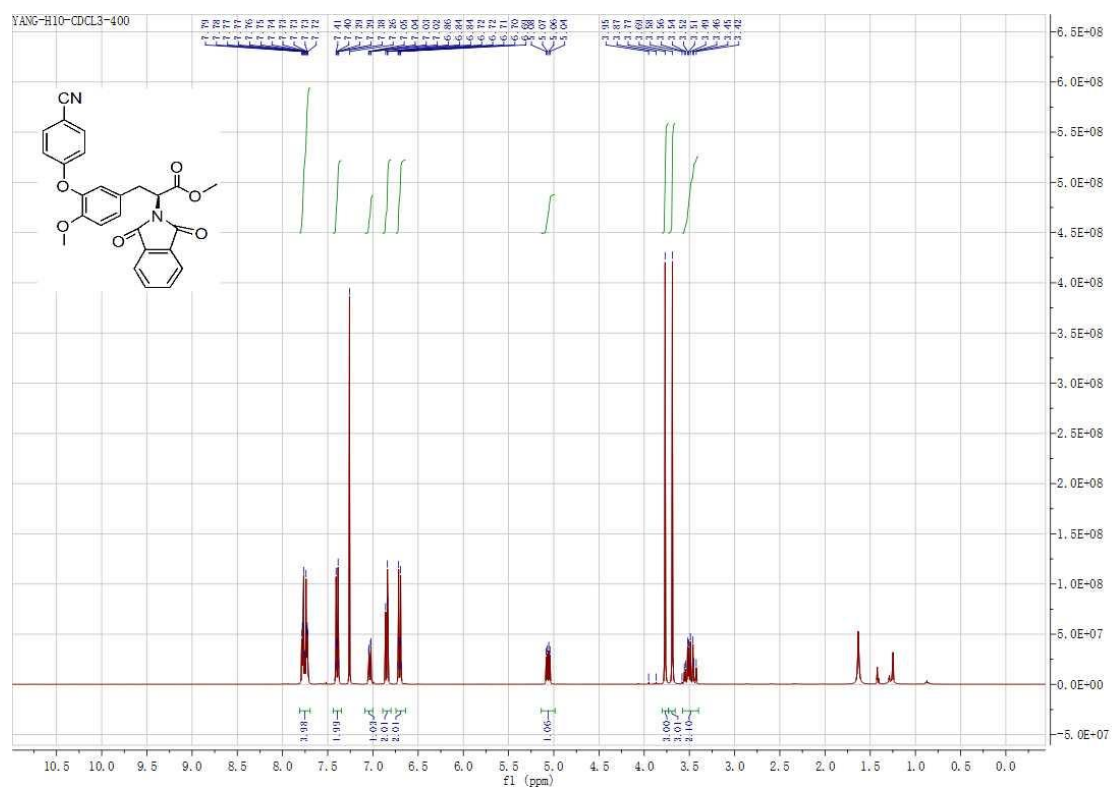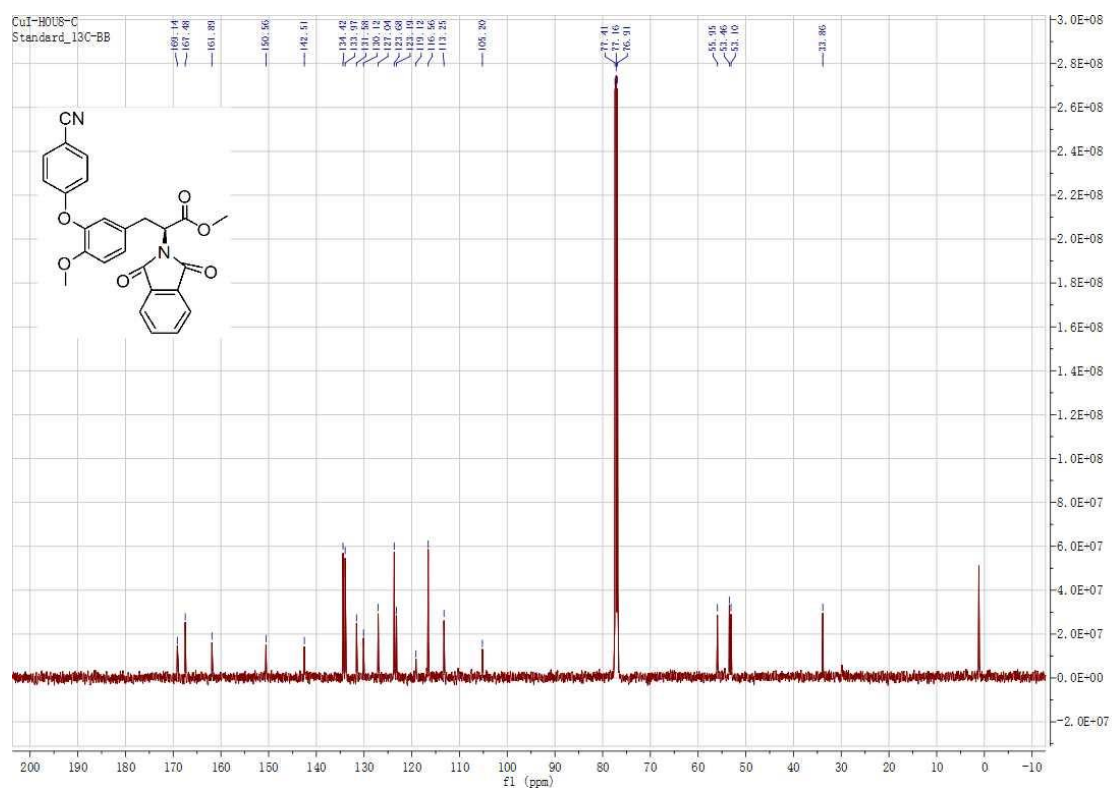

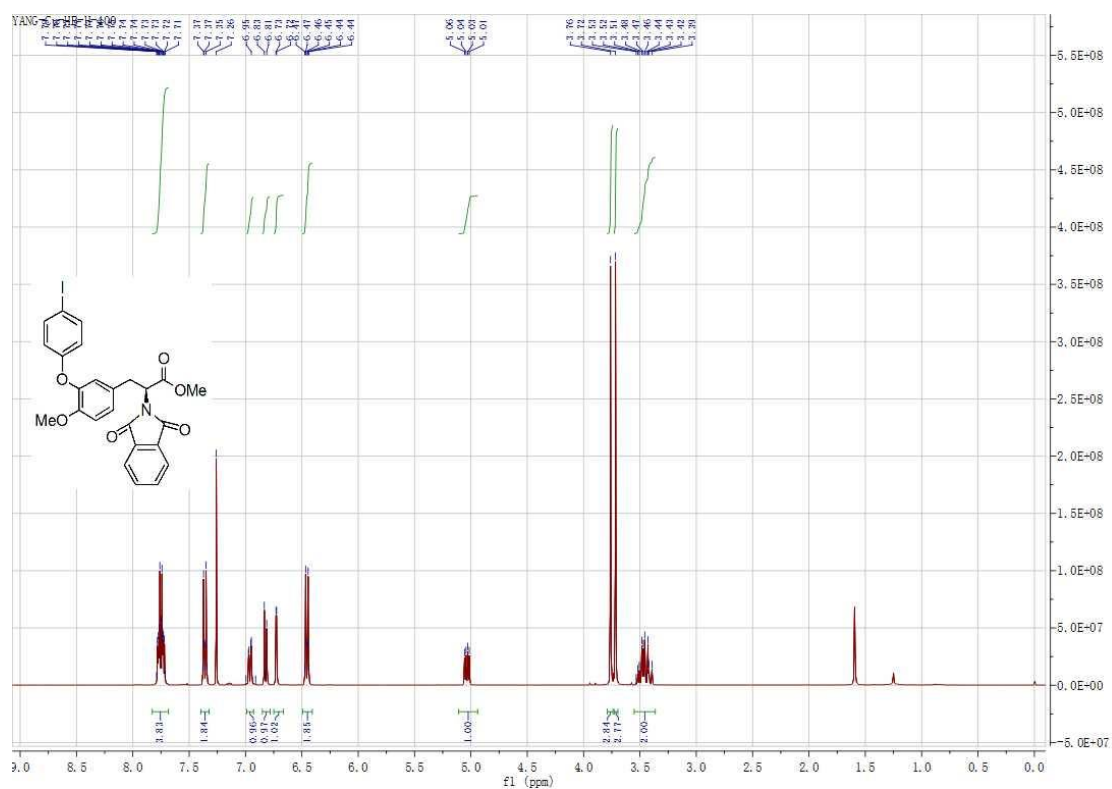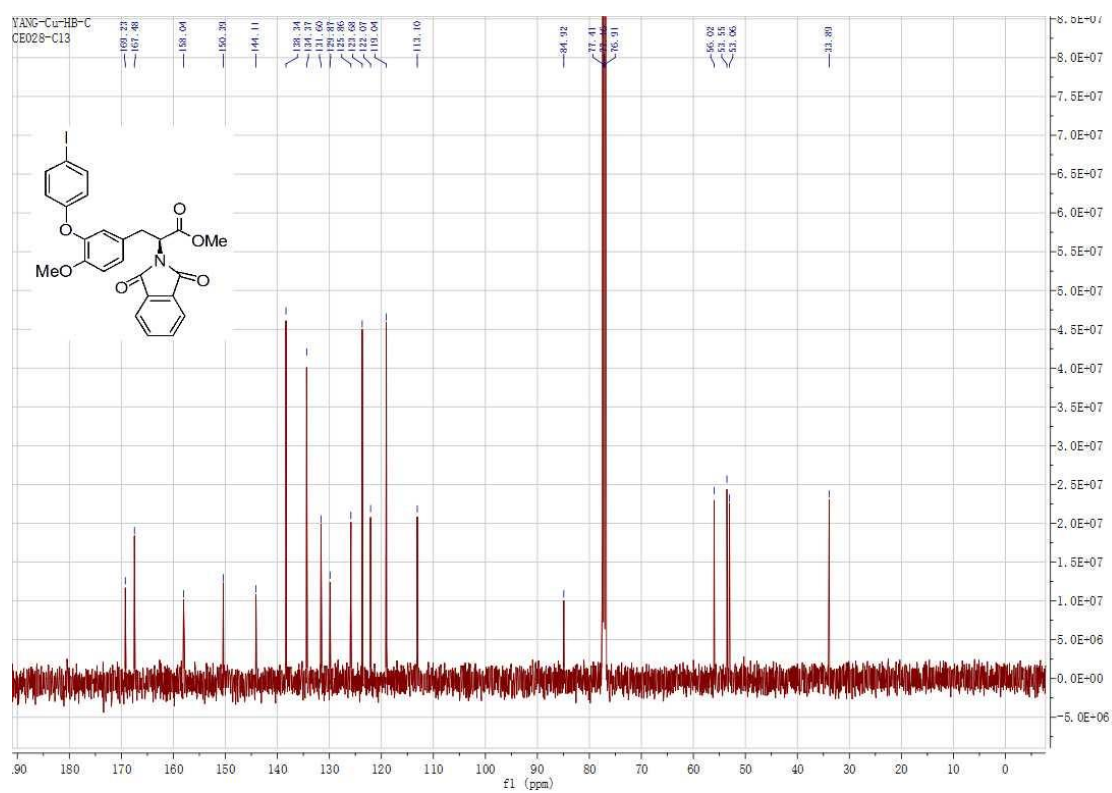

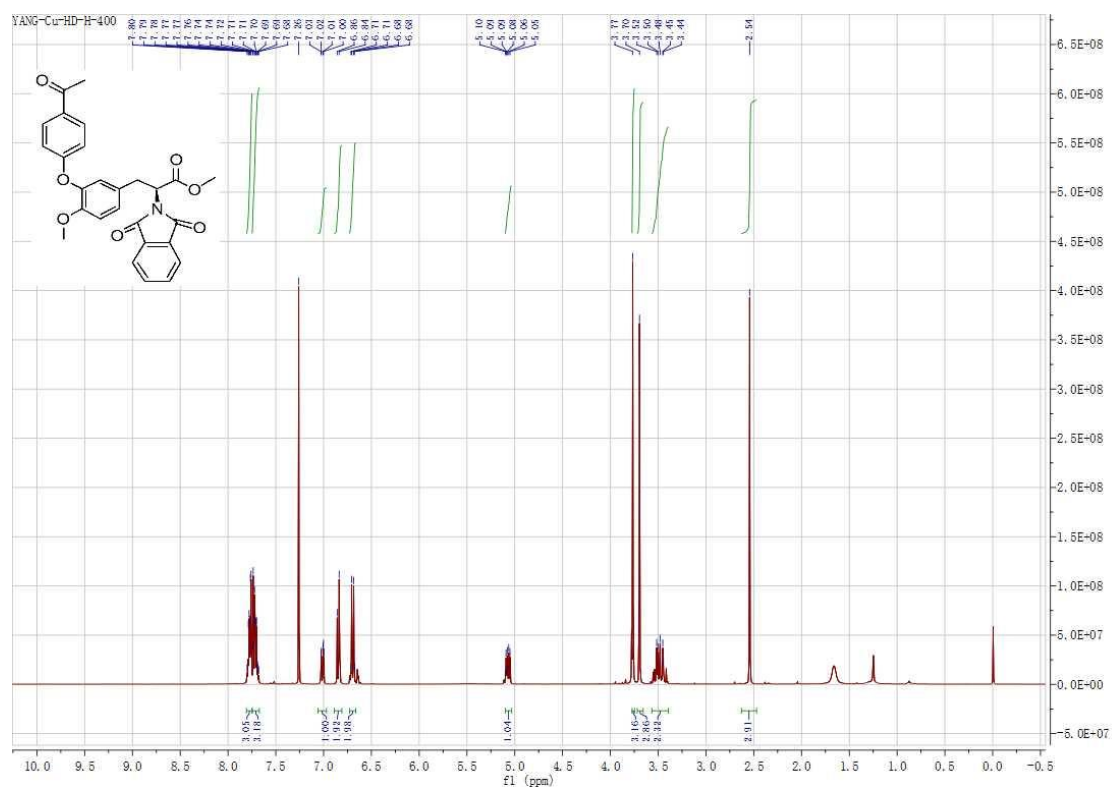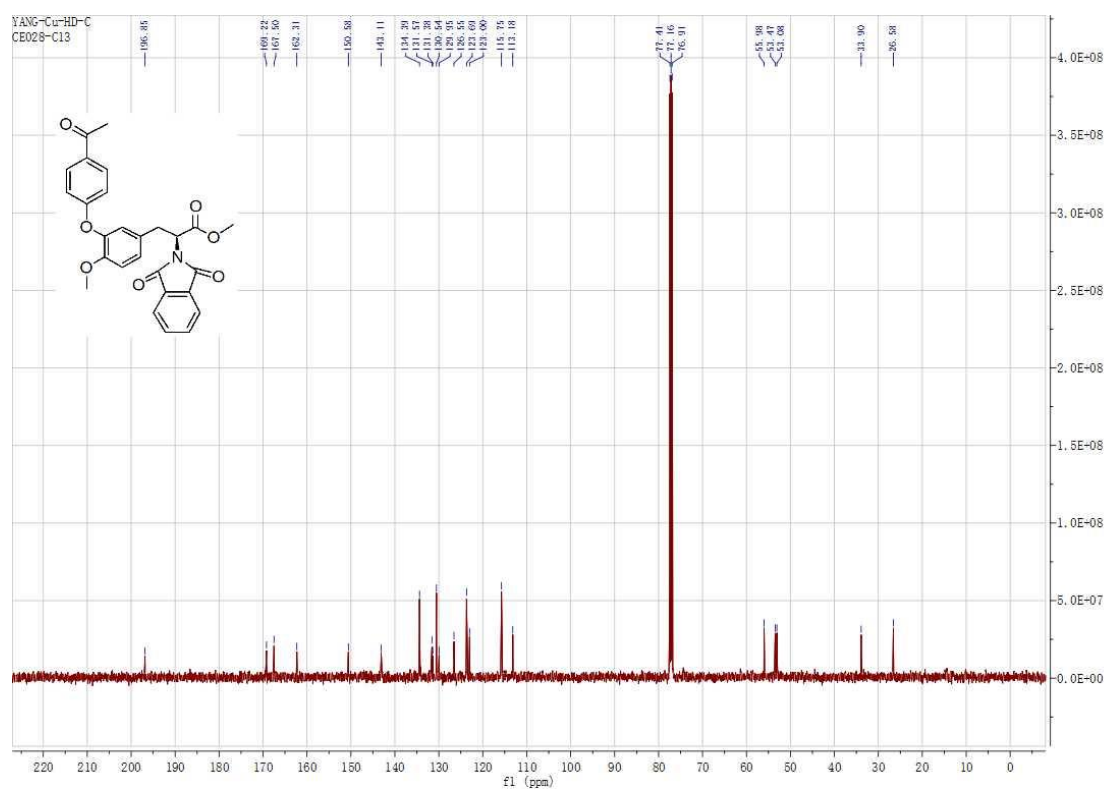

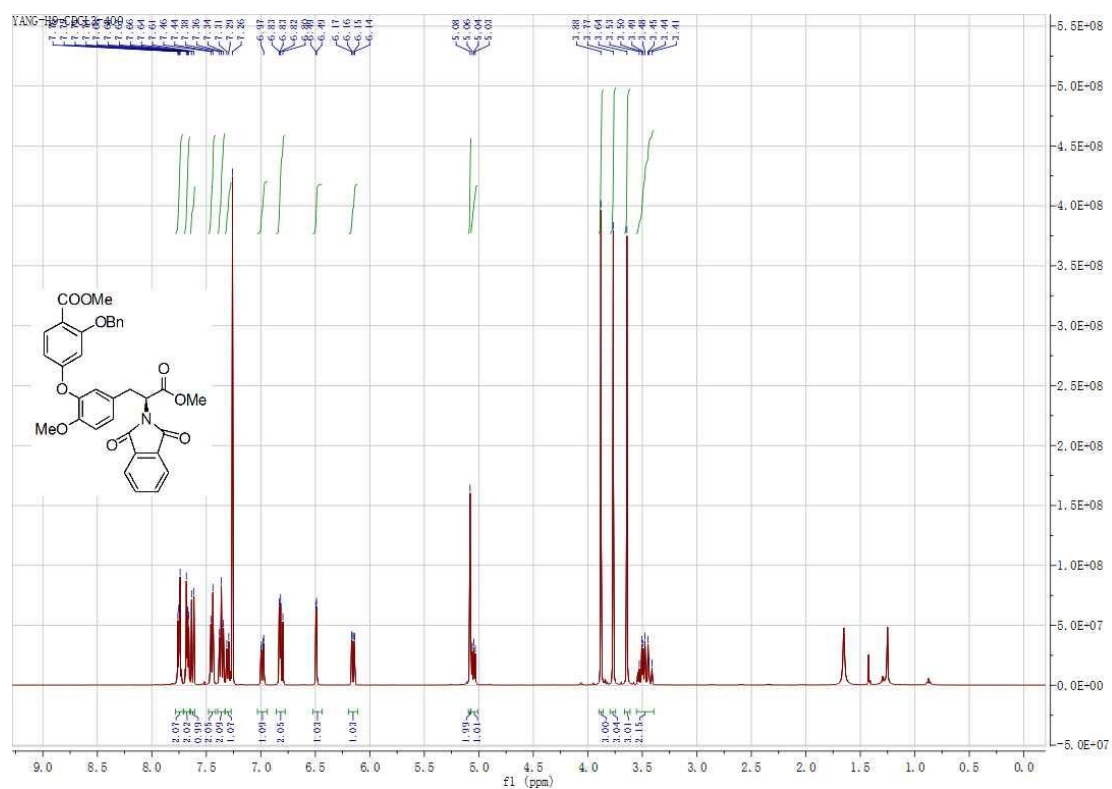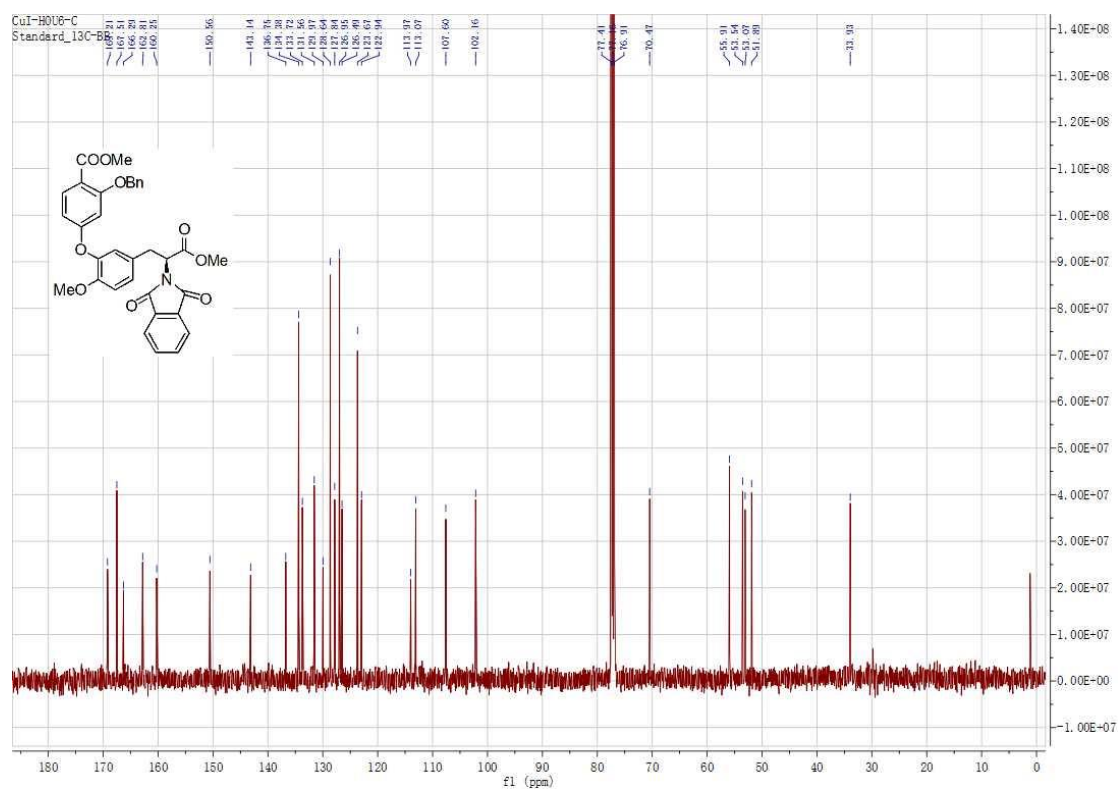

Supplement: s1 [file s1]
